# Supplementary material for: Diverse LXG toxin and antitoxin systems specifically mediate intraspecies competition in Bacillus subtilis biofilms
Source: PubMed Central journal article supplement (PMC8321402; doi:10.1371/journal.pgen.1009682), 2021-07-19
Supplement: pgen.1009682.s001.pdf [file pgen.1009682.s001.pdf]

# A

YokI -MKVFEADSLLEADKRTKEYKELRSQMVKLLKAFKAVADLDDSKFSGKGADNIKAFYHD  
 YobL -MKVFEADSLLEADKRTKEYKELRSQMVKLLKAFKAVANLDDSEFSGKGADNIKAFYHG  
 YeeF -MKVFEAKTLLSEATDRAKEYKELRTQMVNLRKALKGVADLSDSEFSGKGASNIKAFYHD  
 YqcG -MKVFEAKTLLTEAEKRAQEYKDLKSKMVKLLKAFKAVADLDDSEFSGKGANNIKSFYED  
 YwqJ MSKVFEASKSLIEAKSRKKQYETLEEQLNLTLLKAFQGVADLGDN-FKGNADNIKDFEQG  
 YxiD -MKTLDVHALHEGIQHTIEKLDKQKQLEKLEKSVEHLAGMKDA-LKGKGGDAIRTFYEE

YokI -HVGVTDQWIDLIDMKIVFLSSISAKLEDAK-MSDAYIEESFLEHELNVNAYTKSKSIMSE  
 YobL -HVGVTDQWIDLIDMKIAFLSSMSATLEDAK-MSDAYIEESFLEHELANAYAKSKSIMSE  
 YeeF -HVGVADQWIDYIDMKIAFFNSIAGAAEDKG-LSDAYIEESFLEHELANANKSKSIMSE  
 YqcG -QAGIADQWIDLITEMKISFLTSTIPGFLEDAN-LSDAYIEETFLAHELANAYTKSKSIMSE  
 YwqJ -QAEIVDSWLTLSVAQIAFLNGISGDIKDQE-LNDSYVETSFLDHELPHNGDLKASEIVSA  
 YxiD CHKPFLLFFGIFIDEYKVKLQQTQHAISSVESNSHGMIAEAFLSHDARHGKVKHAREVTEQ

YokI QKKAMKDILNDINDILPLEIFSTEDFKDKLSSADDKREKTIIDKINKLDEDLKTEYAESEQ  
 YobL QKKAMKDILNNINDILPLEIFSTEDFKDKLSSADDKREKTIIDKLNKLEDEDLKTEYAESEP  
 YeeF QKKAMKDILNDIDDILPLDLFSTETFKDELADANDKRKKTLEKLDALDEDLKTEYALSEP  
 YqcG QKKAMKDILNDINDILPLDLFSTETFKNELSSAEKKRKEATEKMEVDQNLTSYGLSEA  
 YwqJ HKEEIDSILSGISDIIDLDMYTLDDYADKMGDAQKIRRDITAVDKLDESLTEYQNLSE  
 YxiD LTDAVNRQTSALDHIVSLPTVNDSEFRMETEQAERLISDTLNKLFQFDGQQTQALEAASK

YokI NEQFI  
 YobL NEQFI  
 YeeF NEQFI  
 YqcG NEQMI  
 YwqJ LDNAV  
 YxiD DFQTM

# B

TelA --MKIDMTEVNNKTAIANSISNLNGQIDTAI NSLTNLTS SSSLTLDVKTAIDAKINNYQ  
 TelB MSFHVEVAELYRSLQTVNESETAIRLEETTSYHRILT SNSMHQVGTALSEEINTAH  
 TelC --SKMDLGKSAQADS VKKMCQAQMAGYQALQSQVFAIDTESLKCKAYDSAR-AYF

TelA VPLT TNFTNALTTLSAQYDKTEQFCSTVSNAAADAVIDTDYLQGLDNISGIETSISTI  
 TelB TVVVVRKHLLYLLHQDFSKELTSFQATGESSPTAVLDEEVLLIHANQTYQSVSSKVEAI  
 TelC STILPLAQQSEIYAESLQKAKLPEYQARVDTKSWDEEDLLRIRQEEEQIHQLEAI

TelA NTETSTIYSISLIIISINPDSSTITTPLA AAKTILTDTKTNMESFNGWTRGTELADLLL  
 TelB HRVQQA AAKVSLIIVEES-DRHHYHAFODNLYNAREVITKAIQVSAWDAAGQTLGSEG  
 TelC YESISRLEISRTEKQNRRTNTDLIRGHQANKR-VYEVILEGLRVYDTYSATLFEELEEI

TelA SQTQTIETIGYAS  
 TelB ALQELQLLITSLR-  
 TelC DLQLQRGL-----
