# Supplementary material for: Diverse LXG toxin and antitoxin systems specifically mediate intraspecies competition in Bacillus subtilis biofilms
Source: PubMed Central journal article supplement (PMC8321402; doi:10.1371/journal.pgen.1009682), 2021-07-19
Supplement: pgen.1009682.s004.pdf [file pgen.1009682.s004.pdf]

A

|                    |  | LXG                                                            |     |
|--------------------|--|----------------------------------------------------------------|-----|
| YeeF NCIB3610      |  | --MKVFEAKTLLSEATDRAKEYKELRTQMVNLRKALKGVADLSDSEFSGKGASNIKAFYH   | 58  |
| AI134755.1_TO-A    |  | --MKVFEAKTLLSEATDRAKEYKELRTQMVNLRKALKSVADLSDSEFSGKGASNIKAFYH   | 58  |
| BAI84196.2_BEST195 |  | --MKVFEAKTLLSEAADRAKEYKELRTQMVNLRKALKSVADLSDSEFSGKGASNIKAFYH   | 58  |
| AGA22340.1_BSP1    |  | -----MRKALKSVADLSDSEFSGKGASNIKAFYH                             | 29  |
| AEP89767.1_RO-NN-1 |  | --MKVFEAKTLLSEATDRAKEYKELRTQMVNLRKALKSVADLSDSEFSGKGASNIKAFYH   | 58  |
| AGE62550.1_XF-1    |  | MVMKVFEAKTLLSEATDRAKEYKELRTQMVNLRKALKSVADLSDSEFSGKGASNIKTFYH   | 60  |
| AKD34079.1_HJ5     |  | --MKVFEAKTLLSEATDRAKEYKELRTQMVNLRKALKSVADLSDSEFSGKGASNIKTFYH   | 58  |
| AGI27947.1_BAB-1   |  | --MKVFEAKTLLSEATDRAKEYKELRTQMVNLRKALKSVADLSDSEFSGKGASNIKTFYH   | 58  |
| ADM36747.1_W23     |  | --MKVLEVKTLLSEATDRAKEYKELRTQMVNLRKALKSVADLGDSEFSGKGASNIKAFYH   | 58  |
|                    |  | LXG                                                            |     |
| YeeF NCIB3610      |  | DHVGVDQWIDYIDMKIAFFNSIAGAAEDKGLSDAYIEESFLEHELANANKKSKSIMSEQ    | 118 |
| AI134755.1_TO-A    |  | DHVGVDQWIDYIDMKIAFFNSIAGAAEDKGLSDAYIEESFLEHELANANKKSKSIMSEQ    | 118 |
| BAI84196.2_BEST195 |  | DHVGVDQWIDYIDMKIAFFNSIAGAAEDKGLSDAYIEESFLEHELANANKKSKSIMSEQ    | 118 |
| AGA22340.1_BSP1    |  | DHVGVDQWIDYIDMKSHFSTASPEPPKTKASQHTSKNPSWSTNWQMPIKSKSIMSEQ      | 89  |
| AEP89767.1_RO-NN-1 |  | DHVGVDQWIDYIDMKIAFFNSIAGAAEDKGLSDAYIEESFLEHELANANKKSKSIMSEQ    | 118 |
| AGE62550.1_XF-1    |  | DHVGVDQWIDYIDMKIAFFNSIAGAAEDKGLSDAYIEESFLEHELANANKKSKSIMSEQ    | 120 |
| AKD34079.1_HJ5     |  | DHVGVDQWIDYIDMKIAFFNSIAGAAEDKGLSDAYIEESFLEHELANANKKSKSIMSEQ    | 118 |
| AGI27947.1_BAB-1   |  | DHVGVDQWIDYIDMKIAFFNSIAGAAEDKGLSDAYIEESFLEHELANANKKSKSIMSEQ    | 118 |
| ADM36747.1_W23     |  | DHVGVDQWIDYIDMKIAFFNSIAGAAEDKGLSDAYIEESFLEHELANANKKSKSIMSEQ    | 118 |
|                    |  | LXG                                                            |     |
| YeeF NCIB3610      |  | KKAMKDILNDIDDLPLDLFSTETFKDELADANDKRKKTLEKLDALDEDLKTEYALSEPN    | 178 |
| AI134755.1_TO-A    |  | KKAMKDILNDIDDLPLDLFSTETFKDELADANDKRKKTLEKLDALDEDLKTEYALSEPN    | 178 |
| BAI84196.2_BEST195 |  | KKAMKDILNDIDDLPLDLFSTETFKDELADANDKRKKTLEKLDALDEDLKTEYALSEPN    | 178 |
| AGA22340.1_BSP1    |  | KKAMKDILNDVDDILPLDLFSTETFKDELADANDKRKKTLEKLDALDEDLKTEYALSEPN   | 149 |
| AEP89767.1_RO-NN-1 |  | KKAMKDILNDIDDLPLDLFSTETFKDELADANNKRKKTLEKLDALDEDLKTEYALSEPN    | 178 |
| AGE62550.1_XF-1    |  | KKAMKDILNDIDDLPLDLFSTETFKDELADANDKRKKTLEKLDALDEDLKTEYALSEPN    | 180 |
| AKD34079.1_HJ5     |  | KKAMKDILNDIDDLPLDLFSTETFKDELADANDKRKKTLEKLDALDEDLKTEYALSEPN    | 178 |
| AGI27947.1_BAB-1   |  | KKAMKDILNDIDDLPLDLFSTETFKDELADANDKRKKTLEKLDALDEDLKTEYALSEPN    | 178 |
| ADM36747.1_W23     |  | KKAMKDILNDIDDLPLDLFSTETFNDELADANDKRKKTLEKLDALDEDLKTEYALSEPN    | 178 |
|                    |  | LXG                                                            |     |
| YeeF NCIB3610      |  | EQFIKSDFQKLQEATGKGKNATPIHYNKAYRESDIHKKKGDIEKRTEAYLKI KKEEAAKE  | 238 |
| AI134755.1_TO-A    |  | EQFIKSDFQKLQEATGKGKNATPIHYNKAYRESDIHKKKGDIEKRTEAYLKI KKEEAAKE  | 238 |
| BAI84196.2_BEST195 |  | EQFIKSDFQKLQEATGKGKNATPIHYNKAYRESDIHKKKGDIEKRTEAYLKI KKEEAAKE  | 238 |
| AGA22340.1_BSP1    |  | EQFIKSDFQKLQEATGKGKNATPIHYNKAYRESDIHKKKGDIEKRTEAYLKI KKEEAAKE  | 209 |
| AEP89767.1_RO-NN-1 |  | EQFIKSDFQKLQEATGKGKNATPIHYNKAYRESDIHKKKGDIEKRTEAYLKI KKEEAAKE  | 238 |
| AGE62550.1_XF-1    |  | EQFIKSDFQKLQEATGKGKTATPIHYNKAYRESDIHKKKGDIEKRTEAYLKI KKEEAAKE  | 240 |
| AKD34079.1_HJ5     |  | EQFIKSDFQKLQEATGKGKNATPIHYNKAYRESDIHKKKGDIEKRTEAYLKI KKEEAAKE  | 238 |
| AGI27947.1_BAB-1   |  | EQFIKSDFQKLQEATGKGKNATPIHYNKAYRESDIHKKKGDIEKRTEAYLKI KKEEAAKE  | 238 |
| ADM36747.1_W23     |  | EQFIKSDFQKLQEATGKGKNATPIHYNKAYRESDIHKKKGDIEKRTEAYLKI KKEEAAKE  | 238 |
|                    |  | LXG                                                            |     |
| YeeF NCIB3610      |  | REIEKLKERLKNYDYADADEFYEMAKTIGYENLTAEQQRYFTQIENRELEAGFKGVAVG    | 298 |
| AI134755.1_TO-A    |  | REIEKLKERLKNYDYADADEFYEMAKTIGYENLTAEQQRYFTQIENRELEAGFKGVAVG    | 298 |
| BAI84196.2_BEST195 |  | REIEKLKERLKNYDYADADEFYEMAKTIGYENLTAEQQRYFTQIENRELEAGFKGVAVG    | 298 |
| AGA22340.1_BSP1    |  | REIEKLKERLKNYDYADADEFYEMAKTIGYKNLTAEQQRYFTQIENRELEAGFKGVAVG    | 269 |
| AEP89767.1_RO-NN-1 |  | REIEKLKERLKNYDYADADEFYEMAKTIGYENLTAEQQRYFTQIENRELEAGFKGVAVG    | 298 |
| AGE62550.1_XF-1    |  | REIEKLKERLKNYDYADADEFYEMAKTIGYENLTAEQQRYFTQIENRELEAGFKGVAVG    | 300 |
| AKD34079.1_HJ5     |  | REIEKLKERLKNYDYADADEFYEMAKTIGYENLTAEQQRYFTQIENRELEAGFKGVAVG    | 298 |
| AGI27947.1_BAB-1   |  | REIEKLKERLKNYDYADADEFYEMAKTIGYENLTAEQQRYFTQIENRELEAGFKGVAVG    | 298 |
| ADM36747.1_W23     |  | REIEKLKERLKNYDYADADEFYEMAKTIGYENLTAEQQRYFTQIENRELEAGFKGVAVG    | 298 |
|                    |  | LXG                                                            |     |
| YeeF NCIB3610      |  | LYDSGKDAVVGGLWDMVTPDGGTVEAITGAMAHPIKTYEASAAIEESYQKDMVNGDYSR    | 358 |
| AI134755.1_TO-A    |  | LYDSGKDAVVGGLWDMVTPDGGTVEAITGAMAHPIKTYEASAAIEESYQKDMVNGDYSR    | 358 |
| BAI84196.2_BEST195 |  | LYDSGKDAVVGGLWDMVTPDGGTVEAITGAMAHPIKTYEASAAIEESYQKDMVNGDYSR    | 358 |
| AGA22340.1_BSP1    |  | LYDSGKDAVVGGLWDMVTPDGGTVEAITGAVAHPIKTYEASAAIEESYQKDMVNGDYSR    | 329 |
| AEP89767.1_RO-NN-1 |  | LYDSGKDAVVGGLWDMVTPDGGTVEAITGAVAHPIKTYEASAAIEESYQKDMVNGDYSR    | 358 |
| AGE62550.1_XF-1    |  | LYDSGKDAVVGGLWDMVTPDGGTVEAITGAVAHPIKTYEASAAIEESYQKDMVNGDYSR    | 360 |
| AKD34079.1_HJ5     |  | LYDSGKDAVVGGLWDMVTPDGGTVEAITGAVAHPIKTYEASAAIEESYQKDMVNGDYSR    | 358 |
| AGI27947.1_BAB-1   |  | LYDSGKDAVVGGLWDMVTPDGGTVEAITGAVAHPIKTYEASAAIEESYQKDMVNGDYSR    | 358 |
| ADM36747.1_W23     |  | LYDSGKDAVVGGLWDMVTPDGGTVEAITGAVAHPIKTYEASAAIEESYQKDMVNGDYSR    | 358 |
|                    |  | LXG                                                            |     |
| YeeF NCIB3610      |  | ARWVSYAVGTVVTSIVGTRKGVAVSKTGTAAKVTTKVKTAASKSATAQKAITVSKQTVDH   | 418 |
| AI134755.1_TO-A    |  | ARWVSYAVGTVVTSIVGTRKGVAVSKTGTAAKVTTKVKTAASKSATAQKAITVSKQTVDH   | 418 |
| BAI84196.2_BEST195 |  | ARWVSYAVGTVVTSIVGTRKGVAVSKTGTAAKVTTAKVKTAAASKSATAQKAIMVSKQTVDH | 418 |
| AGA22340.1_BSP1    |  | ARWVSYAVGTVVTSIVGTRKGVAVSKTGTAAKVTTAKVKTAAASKSATAQKAITVSKQTVDH | 389 |
| AEP89767.1_RO-NN-1 |  | ARWVSYAVGTVVTSIVGTRKGVAVSKTGTAAKVTTAKVKTAAASKSATAQKAITVSKQTVDH | 418 |
| AGE62550.1_XF-1    |  | ARWVSYAVGTVVTSIVGTRKGVAVSKTGTAAKMTAKVKTAAASKSATAQKAITVSKQTVDH  | 420 |
| AKD34079.1_HJ5     |  | ARWVSYAVGTVVTSIVGTRKGVAVSKTGTAAKMTAKVKTAAASKSATAQKAITVSKQTVDH  | 418 |
| AGI27947.1_BAB-1   |  | ARWVSYAVGTVVTSIVGTRKGVAVSKTGTAAKMTAKVKTAAASKSATAQKAITVSKQTVDH  | 418 |
| ADM36747.1_W23     |  | ARWVSYAVGTVVTSIVGTRKGVAVSKTGTAATKVTAKVKTAAASKSATAQKAITVSKQTVDH | 418 |

S4 Fig A. continued

A

|                    |                                                                |     |
|--------------------|----------------------------------------------------------------|-----|
| YeeF NCIB3610      | IKQKVNTGIEVSKKHVKTKLNQIGDLTTLADILPYHPRHDLVPAGVPPYNAVNGVTLKEGLQ | 478 |
| AI134755.1 TO-A    | IKQKVNTGIEVSKKHVKTKLNQIGDLTTLADILPYHPRHDLVPAGVPPYNAVNGVTLKEGLQ | 478 |
| BAI84196.2 BEST195 | IKQKVNTGIEVSKKHVKTKLNQIGDLTTLADILPYHPRHDLVPAGVPPYNAVNGVTLKEGLQ | 478 |
| AGA22340.1_BSP1    | IKQKVNTGIEVSKKHVKTKLNQIGDLTTLADILPYHPRHDLVPAGVPPYNAVNGVTLKEGLQ | 449 |
| AEP89767.1_RO-NN-1 | IKQKVNTGIEVSKKHVKTKLNQIGDLTTLADILPYHPRHDLVPAGVPPYNAVNGVTLKEGLQ | 478 |
| AGE62550.1_XF-1    | IKQKVNTGIEGSKKHVKTKLNQIGDLTTLADILPYHPRHDLVPAGVPPYNAVNGVTLKEGLQ | 480 |
| AKD34079.1_HJ5     | IKQKVNTGIEGSKKHVKTKLNQIGDLTTLADILPYHPRHDLVPAGVPPYNAVNGVTLKEGLQ | 478 |
| AGI27947.1_BAB-1   | IKQKVNTGIEGSKKHVKTKLNQIGDLTTLADILPYHPRHDLVPAGVPPYNAVNGVTLKEGLQ | 478 |
| ADM36747.1_W23     | IKQKVNTGIEVSKKHVKTKLNQIGDLTTLADILPYHPRHDLVPAGVPPYNAVNGVTLKEGLQ | 478 |
|                    | *****.* ** *****.******                                        |     |
|                    | toxin                                                          |     |
| YeeF NCIB3610      | KFAKVILPKPYGTSSSGRRTPAPHVPPVTVKYGEHFARWSRKKVLKPNIIYKTKEGYTYT   | 538 |
| AI134755.1 TO-A    | KFAKVILPKPYGTSSSGRRTPAPHVPPVTVKYGEHFARWSRKKVLKPNIIYKTKEGYTYT   | 538 |
| BAI84196.2 BEST195 | KFAKVILPKPYGTSSSGRRTPAPHVPPVTVKYGEHFARWSRKKVLKPNIIYKTKEGYTYT   | 538 |
| AGA22340.1_BSP1    | KFAKVILPKPYGTSSSGRRTPAPHVPPVTVKYGEHFARWSRKKVLKPNIIYKTKEGYTYT   | 509 |
| AEP89767.1_RO-NN-1 | KFAKVILPKPYGTSSSGRRTPAPHVPPVTVKYGEHFARWSRKKVLKPNIIYKTKEGYTYT   | 538 |
| AGE62550.1_XF-1    | KFAKVILPKPYGTSSSGRRTPAPHVPPVTVKYGEHFARWSRKKVLKPNIIYKTKEGYTYT   | 540 |
| AKD34079.1_HJ5     | KFAKVILPKPYGTSSSGRRTPAPHVPPVTVKYGEHFARWSRKKVLKPNIIYKTKEGYTYT   | 538 |
| AGI27947.1_BAB-1   | KFAKVILPKPYGTSSSGRRTPAPHVPPVTVKYGEHFARWSRKKVLKPNIIYKTKEGYTYT   | 538 |
| ADM36747.1_W23     | KFAKVILPKPYGTSSSGRRTPAPHVPPVTVKYGEHFARWSRKKVLKPNIIYKTKEGYTYT   | 538 |
|                    | *****.* ** *****.******                                        |     |
|                    | toxin                                                          |     |
| YeeF NCIB3610      | TDNYGRITSVKADLQLGEAKRNQYAQTNAGKPQDRKPDGGLIATQFKGSGQFDNIIVP     | 598 |
| AI134755.1 TO-A    | TDNYGRITSVKADLQLGEAKRNQYAQTNAGKPQDRKPDGGLIATQFKGSGQFDNIIVP     | 598 |
| BAI84196.2 BEST195 | TDNYGRITSVKADLQLGEAKRNQYAQTNAGKPQDRKPDGGLIATQFKGSGQFDNIIVP     | 598 |
| AGA22340.1_BSP1    | TDNYGRITSVKADLQLGEAKRNQYAQTNAGKPQDRKPDGGLIATQFKGSGQFDNIIVP     | 569 |
| AEP89767.1_RO-NN-1 | TDNYGRITSVKADLQLGEAKRNQYAQTNAGKPQDRKPDGGLIATQFKGSGQFDNIIVP     | 598 |
| AGE62550.1_XF-1    | TDNYGRITSVKADLQLGEAKRNQYAQTNAGKPQDRKPDGGLIATQFKGSGQFDNIIVP     | 600 |
| AKD34079.1_HJ5     | TDNYGRITSVKADLQLGEAKRNQYAQTNAGKPQDRKPDGGLIATQFKGSGQFDNIIVP     | 598 |
| AGI27947.1_BAB-1   | TDNYGRITSVKADLQLGEAKRNQYAQTNAGKPQDRKPDGGLIATQFKGSGQFDNIIVP     | 598 |
| ADM36747.1_W23     | TDNYGRITSVKADLQLGEAKRNQYAQSHAGKPQDRKPDGGLIATQFKGSGQFDNIIVP     | 598 |
|                    | *****.* ** *****.******                                        |     |
|                    | toxin                                                          |     |
| YeeF NCIB3610      | MNSQINRSGGKWEQEWAKALSCKPPKVAQVQIEPVYSGDSLSPSYFDVTVKIGSRKE      | 658 |
| AI134755.1 TO-A    | MNSQINRSGGKWEQEWAKALSCKPPKVAQVQIEPVYSGDSLSPSYFDVTVKIGSRKE      | 658 |
| BAI84196.2 BEST195 | MNSQINRSGGKWEQEWAKALSCKPPKVAQVQIEPVYSGDSLSPSYFDVTVKIGSRKE      | 658 |
| AGA22340.1_BSP1    | MNSQINRSGGRWYEMEQEWAKALKEEPPQKVVNIKAIYKGDLSRDPKFIKVIKRIQDADF   | 629 |
| AEP89767.1_RO-NN-1 | MNSQINRSGGRWYEMEQEWAKALKEEPPQKVVNIKAIYKGDLSRDPKFIKVIKRIQDADF   | 658 |
| AGE62550.1_XF-1    | MNSQINRSGGRWYEMEQEWAKALKEEPPQKVVNIKAIYKGDLSRDPKFIKVIKRIQDADF   | 658 |
| AKD34079.1_HJ5     | MNSQINRSGGRWYEMEQEWAKALKEEPPQKVVNIKAIYKGDLSRDPKFIKVIKRIQDADF   | 658 |
| AGI27947.1_BAB-1   | MNSQINRSGGRWYEMEQEWAKALKEEPPQKVVNIKAIYKGDLSRDPKFIKVIKRIQDADF   | 658 |
| ADM36747.1_W23     | MNSQINRSGGRWYEMEQEWAKALKEEPPQKVVNIKAIYKGDLSRDPKFIKVIKRIQDADF   | 658 |
|                    | *****.* ** *****.******                                        |     |
|                    | ISVSIKNQPGG                                                    | 669 |
| YeeF NCIB3610      | ISVSIKNQPGG                                                    | 669 |
| AI134755.1 TO-A    | ISVSIKNQPGG                                                    | 669 |
| BAI84196.2 BEST195 | VRTIIKNKAGG                                                    | 669 |
| AGA22340.1_BSP1    | EKVTLKNQSGG                                                    | 640 |
| AEP89767.1_RO-NN-1 | EKVTLKNQSGG                                                    | 669 |
| AGE62550.1_XF-1    | EKVTLKNQSGG                                                    | 671 |
| AKD34079.1_HJ5     | EKVTLKNQSGG                                                    | 669 |
| AGI27947.1_BAB-1   | EKVTLKNQSGG                                                    | 669 |
| ADM36747.1_W23     | EKVTLKNQSGG                                                    | 669 |
|                    | . : ** : **                                                    |     |

B

|                      |                                                                         |     |
|----------------------|-------------------------------------------------------------------------|-----|
|                      | <b>LGX</b>                                                              |     |
| AMR62839.1_ATCC49760 | MKVFEADSLLEADKRTKEYKELRSQMVKLRKAFKAVADLDDSEFSGKGANNIKAFYHHD             | 60  |
| YobL NCIB3610        | MKVFEADSLLEADKRTKEYKELRSQMVKLRKAFKAVADLDDSEFSGKGADNIKAFYHGH             | 60  |
| AII35881.1_TO-A      | MKVFEADSLLEADKRTKEYKELRSQMVKLRKAFKAVADLDDSEFSGKGADNIKAFYHGH             | 60  |
| AGA23389.1_BSP1      | MKVFEADSLLEADKRTKEYKELRSQMVKLRKAFQNVANLDDSEFSGKGADNIKAFYHHD             | 60  |
| BAI85563.1_BEST195   | MKVFEADSLLEADKRTKEYKELRSQMVKLRKAFQNVANLDDSEFSGKGADNIKAFYHHD             | 60  |
| AGI29216.1_BAB-1     | MKVFEADSLLEADKRTKEYKELRSQMVKLRKAFQNVATLDDSEFSGKGADNIKAFYHHD             | 60  |
| AKD35310.1_HJ5       | MKVFEADSLLEADKRTKEYKELRSQMVKLRKAFQNVATLDDSEFSGKGADNIKAFYHHD             | 60  |
| AGE63731.1_XF-1      | -----MVKLRKAFQNVATLDDSEFSGKGADNIKAFYHHD                                 | 34  |
| YokI NCIB3610        | MKVFEADSLLEADKRTKEYKELRSQMVKLRKAFKAVADLDDSKFSGKGADNIKAFYHHD             | 60  |
| AEP89572.1_RO-NN-1   | MKVFEAKSLLSEANRAKDYKDLKNQMIKLRKAFKAVADLDDSEFSGKGANNIKAFYHHD             | 60  |
| BAI84001.1_BEST195   | MKVFEAKSLLSEANRAKDYKDLKNQMIKLRKAFKAVADLDDSEFSGKGANNIKAFYHHD             | 60  |
|                      | *:*:*:*:*:* * * *:*:*:*:*:*:*:*                                         |     |
|                      | <b>LGX</b>                                                              |     |
| AMR62839.1_ATCC49760 | VGVTDQWIDLIDMKIAFLSSVSFKVEDAKMSDAYIEESFLEHELNVNAYNKSIMSEQKK             | 120 |
| YobL NCIB3610        | VGVTDQWIDLIDMKIAFLSSSMTATLEDAKMSDAYIEESFLEHELNAVYAKSISIMSEQKK           | 120 |
| AII35881.1_TO-A      | VGVTDQWIDLIDMKIAFLSSSMTATLEDAKMSDAYIEESFLEHELNAVYAKSISIMSEQKK           | 120 |
| AGA23389.1_BSP1      | VGVTDQWIDLIDMKIAFLSSISAKLEDAKMSDAYIEESFLEHELNAVYTKSISIMSEQKK            | 120 |
| BAI85563.1_BEST195   | VGVTDQWIDLIDMKIAFLSSMSAKLEDAKMSDAYIEESFLEHELNAVYTKSISIMSEQKK            | 120 |
| AGI29216.1_BAB-1     | VGVTDQWIDLIDMKIAFLSRMSAKLEDAKMSDAYIEESFLEHELNAVYTKSISIMSEQKK            | 120 |
| AKD35310.1_HJ5       | VGVTDQWIDLIDMKIAFLSRMSAKLEDAKMSDAYIEESFLEHELNAVYTKSISIMSEQKK            | 120 |
| AGE63731.1_XF-1      | VGVTDQWIDLIDMKIAFLSRMSAKLEDAKMSDAYIEESFLEHELNAVYTKSISIMSEQKK            | 94  |
| YokI NCIB3610        | VGVTDQWIDLIDMKIVFLSSISAKLEDAKMSDAYIEESFLEHELNVNAYTKSISIMSEQKK           | 120 |
| AEP89572.1_RO-NN-1   | VGVTDQWIDLIEMKIAFLTSISGVLEEASLSDAYIEESFLEHELNAVYKKSISIMSEQKK            | 120 |
| BAI84001.1_BEST195   | VGVTDQWIDLIEMKIAFLTSISGVLEEDASLSDAYIEESFLEHELTNAVYKKSISIMSEQKK          | 120 |
|                      | *****:*:*:* * * *:*:*:* * * * * * * * * * * * * * * * * * * * * * * * * |     |
|                      | <b>LGX</b>                                                              |     |
| AMR62839.1_ATCC49760 | AMKDILNDINDILPLEIFSTEDFKDKLSSADDKREKTVDTLNLDSESLKTEYAEQTEPNEQ           | 180 |
| YobL NCIB3610        | AMKDILNNINDILPLEIFSTEDFKDKLSSADDKREKTIDKLNKLDEDLKTTEYAEQTEPNEQ          | 180 |
| AII35881.1_TO-A      | AMKDILNNINDILPLEIFSTEDFKDKLSSADDKREKTIDKLNKLDEDLKTTEYAEQTEPNEQ          | 180 |
| AGA23389.1_BSP1      | AMKDILNDINDILPLEIFSTENFKDKLSSADDKREKTIDKLNKLDELNLSYAEQTEPNEQ            | 180 |
| BAI85563.1_BEST195   | AMKDILNDINDILPLEIFSTEDFKDKLSSADDKREKTIDKLNKLDEDLKTTEYAEQTEPNEQ          | 180 |
| AGI29216.1_BAB-1     | AMKDILNDINDILPLEIFSTEDFKDKLSSADDKREKTIDKLNKLDEDLKTTEYVETEPNEQ           | 180 |
| AKD35310.1_HJ5       | AMKDILNDINDILPLEIFSTEDFKDKLSSADDKREKTIDKLNKLDEDLKTTEYVETEPNEQ           | 180 |
| AGE63731.1_XF-1      | AMKDILNDINDILPLEIFSTEDFKDKLSSADDKREKTIDKLNKLDEDLKTTEYVETEPNEQ           | 154 |
| YokI NCIB3610        | AMKDILNDINDILPLEIFSTEDFKDKLSSADDKREKTIDKLNKLDEDLKTTEYAEQTEPNEQ          | 180 |
| AEP89572.1_RO-NN-1   | AMKDILNDIDDLPLDLFSTETFKDELSSAENKRKKTVDKICDVENLKTTEYAEQTEPNEQ            | 180 |
| BAI84001.1_BEST195   | AMKDILNDIDDLPLDLFSTETFKDELSSAENKRKKTVDKIGDVENLKTTEYAEQTEPNEQ            | 180 |
|                      | *****:*:*:* * * *:*:* * * * * * * * * * * * * * * * * * * * * * * * *   |     |
|                      | <b>LGX</b>                                                              |     |
| AMR62839.1_ATCC49760 | FIQQDFKKLQGSTGKGKNATPIHYNAYRESDIHKKKDDIEKHSEAYLSVKKEEAKERE              | 240 |
| YobL NCIB3610        | FIQQDFKKLQESTGKGKNATPIHYNAYRESDIHKKKGDIEKHSEAYLSVKKEEAKERE              | 240 |
| AII35881.1_TO-A      | FIQQDFKKLQESTGKGKNATPIHYNAYRESDIHKKKGDIEKHSEAYLSVKKEEAKERE              | 240 |
| AGA23389.1_BSP1      | FIQQDFKKLQESTGKGKNATPIHYNAYRESDIHKKKGDIEKHSEAYLSVKQEEAKERE              | 240 |
| BAI85563.1_BEST195   | FIQQDFKKLQESTGKGKNATPIHYNAYRESDIHKKKGDIEKHSEAYLSVKKEEAKERE              | 240 |
| AGI29216.1_BAB-1     | FIQQDFKKLQESTGKGKNATPIHYNAYRESDIHKKKGDIEKHSEAYLSVKKEEAKERE              | 240 |
| AKD35310.1_HJ5       | FIQQDFKKLQESTGKGKNATPIHYNAYRESDIHKKKGDIEKHSEAYLSVKKEEAKERE              | 240 |
| AGE63731.1_XF-1      | FIQQDFKKLQESTGKGKNATPIHYNAYRESDIHKKKGDIEKHSEAYLSVKKEEAKERE              | 214 |
| YokI NCIB3610        | FIQQDFKKLQESTGKGKNATPIHYNAYRESDIHKKKGDIEQHSAYLTVKKEEAKERE               | 240 |
| AEP89572.1_RO-NN-1   | FIKADFQKLQESTGKGKNATPLHYNAYRESDIHKKKGDIEKQSEAYLTIKKEEAKKHE              | 240 |
| BAI84001.1_BEST195   | FIKADFQKLQESTGKGKNATPLHYNAYRESDIHKKKGDIEKQSEAYLTIKKEEANKCE              | 240 |
|                      | **:*:*:* * * * * * * * * * * * * * * * * * * * * * * * * * * * * * *    |     |
|                      | <b>LGX</b>                                                              |     |
| AMR62839.1_ATCC49760 | IKELKKKLNLDGSDPDEYLEIAKKVGYENLEPAQVQLAVQIEQAKQLEGAGEITWDIVKG            | 300 |
| YobL NCIB3610        | IKELKKKLNLDGSDPDEYLEIAKKVGYENLEPTQVQLAVQIEQAKQLEGAGEITWDIVKG            | 300 |
| AII35881.1_TO-A      | IKELKKKLNLDGSDPDEYLEIAKKVGYENLEPTQVQLAVQIEQAKQLEGAGEITWDIVKG            | 300 |
| AGA23389.1_BSP1      | IKELKKKLNLDGSDPDEYLEIAKKVGYENLEPAQVQLAVQIEQAKQLEGAGEITWDIVKG            | 300 |
| BAI85563.1_BEST195   | IKELKKKLNLDGSDPVEYLEIAKKVGYENLEPAQVQLAVQIEQAKQLEGAGEITWDIVKG            | 300 |
| AGI29216.1_BAB-1     | IKELKKKLNLDGSDPDEYLEIAKKVGYENLEPAQVQLAVQIEQAKQLEEAGEVETWDIVKG           | 300 |
| AKD35310.1_HJ5       | IKELKKKLNLDGSDPDEYLEIAKKVGYENLEPAQVQLAVQIEQAKQLEEAGEVETWDIVKG           | 300 |
| AGE63731.1_XF-1      | IKELKKKLNLDGSDPDEYLEIAKKVGYENLEPAQVQLAVQIEQAKQLEEAGEVETWDIVKG           | 274 |
| YokI NCIB3610        | IKELKKKLNLDGSDPDEYLEIAKKVGYENLEPAQVQLAVQIEQAKQLEGAGEITWDIVKG            | 300 |
| AEP89572.1_RO-NN-1   | IKDLKRQLV-KVTDPPDEYLKIAKKIGYENLEPEQQVYFRQLEELQQK-----AEIGKG             | 292 |
| BAI84001.1_BEST195   | IKDLKQLV-KVTDPPDEYLKIAKKIGYENLEPEQQVYFRQLEELQQK-----AEIGKG              | 292 |
|                      | **:*:*:* * * * * * * * * * * * * * * * * * * * * * * * * * * * * * *    |     |

B

|                      |                                                                                          |     |
|----------------------|------------------------------------------------------------------------------------------|-----|
| AMR62839.1_ATCC49760 | VGVGLYDVGKDTVTGIWDFITDPGETLSALGNAVIHPVKTYDAISAAIEESYQKDMVNGD                             | 360 |
| YobL NCIB3610        | VGVGLYDVGKDTVTGIWDFITDPGETLSALGNAAMHPVKTYDAISAAIEESYQKDMVNGD                             | 360 |
| AI135881.1_TO-A      | VGVGLYDVGKDTVTGIWDFITDPGETLSALGNAAMHPVKTYDAISAAIEESYQKDMVNGD                             | 360 |
| AGA23389.1_BSP1      | VGVGLYDVGKDTVTGLWDFITDPGETLSALGNAVIHPVKTYDAISAAIEESYQKDMVNGD                             | 360 |
| BAI85563.1_BEST195   | VGVGLYDVGKDTVTGIWDFITDPGETLSALGNAVIHPVKTYDAISAAIEESYQKDMVNGD                             | 360 |
| AGI29216.1_BAB-1     | VGVGLYDVGKDTVTGIWDFITDPGETLSALGNAVIHPVKTYDAISAAIEESYQKDMVNGD                             | 360 |
| AKD35310.1_HJ5       | VGVGLYDVGKDTVTGIWDFITDPGETLSALGNAVIHPVKTYDAISAAIEESYQKDMVNGD                             | 360 |
| AGE63731.1_XF-1      | VGVGLYDVGKDTVTGIWDFITDPGETLSALGNAVIHPVKTYDAISAAIEESYQKDMVNGD                             | 334 |
| YokI NCIB3610        | VGVGLYDVGKDTVTGLWDFITDPGETLSALGNAVIHPVKTYDAISAAIEESYQKDMVNGD                             | 360 |
| AEP89572.1_RO-NN-1   | IAMGMYEAGKDTVMGLYQLARHP IETLSGTVNAALHP IDTYKI IAKDIEDTFQRDMINGD                          | 352 |
| BAI84001.1_BEST195   | IAMGMYEAGKDTVMGLYQLARHP IESLSGTVNAALHP IDTYKI IAKDIEDTFQREMINGD                          | 352 |
|                      | :::*.::*.***** *::: . * **.*. **::*.::*.::*.::*.::*.::*.::*.::*.::*.::*                  |     |
| AMR62839.1_ATCC49760 | AYSRSRWVTYAVGVSAAAIVGTKGAGAINKADAAGKVINKA-----SQ--AGKKLKDVKL                             | 413 |
| YobL NCIB3610        | AYSRSRWVTYAIGSVAVAVVGTGKAGAINKADAAGKVINKA-----SQ--AGKKIKDVKI                             | 413 |
| AI135881.1_TO-A      | AYSRSRWVTYAIGSVAVAVVGTGKAGAINKADAAGKVINKA-----SQ--AGKKIKDVKI                             | 413 |
| AGA23389.1_BSP1      | AYSRSRWVTYAIGSVAAAVVGTGKAGAINKADAAGKVINKA-----SQ--AGKKIKDVKI                             | 413 |
| BAI85563.1_BEST195   | AYSRSRWVTYAVGVSAAVAVVGTGKAGAINKADAAGKVINKA-----SQ--AGKKIKDVKI                            | 413 |
| AGI29216.1_BAB-1     | AYSRSRWVTYAVGVSAAVAVVGTGKAGAINKADAAGKVINKA-----SQ--AGKKIKDVKI                            | 413 |
| AKD35310.1_HJ5       | AYSRSRWVTYAVGVSAAVAVVGTGKAGAINKADAAGKVINKA-----SQ--AGKKIKDVKI                            | 413 |
| AGE63731.1_XF-1      | AYSRSRWVTYAVGVSAAVAVVGTGKAGAINKADAAGKVINKA-----SQ--AGKKIKDVKI                            | 387 |
| YokI NCIB3610        | AYSRSRWVTYAIGSVAAAIVGTKGAGAINKADAAGKVINKA-----SQ--AGKKIKDVKI                             | 413 |
| AEP89572.1_RO-NN-1   | YSRRAKVVSYVGSVTVLVAIVGPKGIDKVSQVAKAGSKVAALKALEASKAGIKKGIYVVKI                            | 412 |
| BAI84001.1_BEST195   | SHSRAKVVSYVGSVTVLVAIVGPKGIDKVSQVAKAGSKVAALKLTLEVSKTGIIKKIYVVKI                           | 412 |
|                      | :::*.::*.::*.::*.::*.::*.::*.::*.::*.::*.::*.::*.::*.::*.::*.::*.::*.::*.::*.::*.::*.::* |     |
| AMR62839.1_ATCC49760 | PDLLPYNPKNKL-ALADNVPYNVVDSQLKNELLTNAKKLPDG----TRKPF TGQKI I P-                           | 467 |
| YobL NCIB3610        | PDLLPYNPKYKL-ALADNVPYNVVDSQLKNELLTNAKKIPDG----TRKPF TGQKSP-                              | 467 |
| AI135881.1_TO-A      | PDLLPYNPKYKL-ALADNVPYNVVDSQLKNELLTNAKKIPDG----TRKPF TGQKSP-                              | 467 |
| AGA23389.1_BSP1      | PDLLPYNPKYDF-ALADNVPYNVVDSQLKNELLTNAKKIPDG----TRKPF TGQKISP-                             | 467 |
| BAI85563.1_BEST195   | PDLLPYNPKYDF-PLADNVPYNVVDSQLKNELLTNAKKIPDG----TRKPF TGQKISP-                             | 467 |
| AGI29216.1_BAB-1     | PDLLPYNPKYDF-ALADNVPYNVVDSQLKNELLTNAKKIPDG----TRKPF TGQKISP-                             | 467 |
| AKD35310.1_HJ5       | PDLLPYNPKYDF-ALADNVPYNVVDSQLKNELLTNAKKIPDG----TRKPF TGQKISP-                             | 467 |
| AGE63731.1_XF-1      | PDLLPYNPKYDF-ALADNVPYNVVDSQLKNELLTNAKKIPDG----TRKPF TGQKISP-                             | 441 |
| YokI NCIB3610        | PDLLPYNPKYDL-AMAGDVVPYNVVDGENLKNQLMSFAKGS D-K----EVKPF DVVYRPS                           | 467 |
| AEP89572.1_RO-NN-1   | PNVFEQ--HYAMAGGSGTFFPNVVDGENYKSALEI FKTSS TVQGLKAKPHEVVNELK-                             | 469 |
| BAI84001.1_BEST195   | PSVFEQ--QFAMAGGSGTFFPNVVDGENYKNSALEI FKNSS TVQGLKAKPHEVVNELK-                            | 469 |
|                      | *.::: : : : . . * . * . * . * . * . : * * . .                                            |     |
| AMR62839.1_ATCC49760 | -----PWLNKEKYEAYEIEGKVKAK---GKVKDVSRRVYTMKDIDINQKTEF                                     | 511 |
| YobL NCIB3610        | -----PWLNKEKYDAYEIEGKVKAK---GKVKDVSRRVYTMKDIDINQKTEF                                     | 511 |
| AI135881.1_TO-A      | -----PWLNKEKYDAYEIEGKVKAK---GKVKDVSRRVYTMKDIDINQKTEF                                     | 511 |
| AGA23389.1_BSP1      | -----PWLNKEKYDAYEIEGKVKAK---GKVKDVSRRVYTMKDIDINQKTEF                                     | 511 |
| BAI85563.1_BEST195   | -----PWLNKEKYDAYEIEGKVKAK---GKVKDVSRRVYTMKDIDINQKTEF                                     | 511 |
| AGI29216.1_BAB-1     | -----PWLNKEKYEAYEIEGKVKAK---GKVKDVSRRVYTMKDIDINQKTEF                                     | 511 |
| AKD35310.1_HJ5       | -----PWLNKEKYEAYEIEGKVKAK---GKVKDVSRRVYTMKDIDINQKTEF                                     | 511 |
| AGE63731.1_XF-1      | -----PWLNKEKYEAYEIEGKVKAK---GKVKDVSRRVYTMKDIDINQKTEF                                     | 485 |
| YokI NCIB3610        | NSPLENHHGVMDVWAKHN-VPNYVSRGNTPTVALTRKEQHNATKKVREWL-----                                  | 517 |
| AEP89572.1_RO-NN-1   | -----TF-----QSRKYTFGQQS-FLIDKRGMKH I LERHHPNLWDGSIKQQSF                                  | 512 |
| BAI84001.1_BEST195   | -----TF-----QSRKYTFGQQS-FLIDKRGMKH I LERHHPNLWDGSIKQQSF                                  | 512 |
|                      | toxin                                                                                    |     |
| AMR62839.1_ATCC49760 | GVTNL-----QLMKNGNAPYAKDGTQINLHHL---IQEEPGPMLE---IPNSLH                                   | 554 |
| YobL NCIB3610        | GVTNL-----QLMKNGNAPYAKDGTQINLHHL---IQEEPGPMLE---IPNSLH                                   | 554 |
| AI135881.1_TO-A      | GVTNL-----QLMKNGNAPYAKDGTQINLHHL---IQEEPGPMLE---IPNSLH                                   | 554 |
| AGA23389.1_BSP1      | GVTNL-----QLMKNGNAPYAKDGTQINLHHL---IQEEPGPMLE---IPNSLH                                   | 554 |
| BAI85563.1_BEST195   | GVTNL-----QLMKNGNAPYAE DGTQINLHHL---IQEEPGPMLE---IPNSLH                                  | 554 |
| AGI29216.1_BAB-1     | GVTNL-----QLMKNGNAPYAKDGTQINLHHL---IQEEPGPMLE---IPNSLH                                   | 554 |
| AKD35310.1_HJ5       | GVTNL-----QLMKNGNAPYAKDGTQINLHHL---IQEEPGPMLE---IPNSLH                                   | 554 |
| AGE63731.1_XF-1      | GVTNL-----QLMKNGNAPYAKDGTQINLHHL---IQEEPGPMLE---IPNSLH                                   | 528 |
| YokI NCIB3610        | -----FEKTGK---KVGKVNWKEVSPREIQELTEKMFDAANVPKEAR                                          | 557 |
| AEP89572.1_RO-NN-1   | LNKEMTVNDVADAIESIMKQNR EELTKKGTKFSYQIRGTYEGQ-----                                        | 555 |
| BAI84001.1_BEST195   | LNKEMTVNDVADAIESIMKQNR EELTKKGTKFSYQIRGTYEGQ-----                                        | 555 |
|                      | toxin                                                                                    |     |
| AMR62839.1_ATCC49760 | TKYSDI IHKLSGDGESFRNDKVLKAQYESFRS-----                                                   | 586 |
| YobL NCIB3610        | TKYSDVIHQKLSGDGESFRNDKVLKAQYESFRKRYWKWRAKQFENEN                                          | 600 |
| AI135881.1_TO-A      | TKYSDVIHQKLSGDGESFRNDKVLKAQYESFRKRYWKWRAKQFENEN                                          | 600 |
| AGA23389.1_BSP1      | TKYSDVIHQKLSGDGESFRNDKVLKAQYESFRKRYWKWRAKQFENEN                                          | 600 |
| BAI85563.1_BEST195   | TKYSDVIHQKLSGDGESFRNDKVLKAQYESFRKRYWKWRAKQFENEN                                          | 600 |
| AGI29216.1_BAB-1     | TKYSDVIHQKLSGDGESFRNDKVLKAQYESFRKRYWKWRAKQFENEN                                          | 600 |
| AKD35310.1_HJ5       | TKYSDVIHQKLSGDGESFRNDKVLKAQYESFRKRYWKWRAKQFENEN                                          | 600 |
| AGE63731.1_XF-1      | TKYSDVIHQKLSGDGESFRNDKVLKAQYESFRKRYWKWRAKQFENEN                                          | 574 |
| YokI NCIB3610        | QQYYN-----AFNQY--NFRK-----                                                               | 571 |
| AEP89572.1_RO-NN-1   | -KY-----VVGFKGRVGFYPEK                                                                   | 573 |
| BAI84001.1_BEST195   | -QY-----VVGFKGRVGFYPEK                                                                   | 573 |
|                      | :*                                                                                       |     |

S4 Fig B

C

|                    |                                                                     |     |
|--------------------|---------------------------------------------------------------------|-----|
|                    | <b>LGX</b>                                                          |     |
| AII36371.1 TO-A    | --MKVFEAKTLLTEAEKRAQEYKDLKSKMVKLKKAFKAVADLDDSEFSGKGANNIKSFYE        | 58  |
| YqcG NCIB3610      | --MKVFEAKTLLTEAEKRAQEYKDLKSKMVKLKKAFKAVADLDDSEFSGKGANNIKSFYE        | 58  |
| ADV93340.1 BSn5    | --MKVFEAKTLLTEAEKRAQEYKDLKSKMVKLKKAFKAVADLDDSEFSGKGANNIKSFYE        | 58  |
| AEP87466.1 TU-B-10 | -----MIAEFSGKGANNIKSFYE                                             | 18  |
| AEP91632.1 RO-NN-1 | --MKVFEAKTLLSEAEKRAKEYKDLKSKMVKLKKAFKAVADLDDSEFSGKGANNIKSFYE        | 58  |
| BAI86935.2 BEST195 | MIMKVFEAKTLLSEAEKRAKEYKDLKSKMVKLKKAFKAVADLDDSEFSGKGANNIKSFYE        | 60  |
|                    | :*****:                                                             |     |
|                    | <b>LGX</b>                                                          |     |
| AII36371.1 TO-A    | DQAGIADQWIDLIEMKISFLTSIPGFLEDANLSDAYIEETFLAHELANAYTKSKSIMSEQ        | 118 |
| YqcG NCIB3610      | DQAGIADQWIDLIEMKISFLTSIPGFLEDANLSDAYIEETFLAHELANAYTKSKSIMSEQ        | 118 |
| ADV93340.1 BSn5    | DQAGIADQWIDLIEMKISFLTSIPGFLEDANLSDAYIEETFLAHELANAYTKSKSIMSEQ        | 118 |
| AEP87466.1 TU-B-10 | DQAGIADQWIDLIEMKISFLTSIPGFLEDANLSDAYIEETFLAHELANAYTKSKSIMSEQ        | 78  |
| AEP91632.1 RO-NN-1 | DQAGIADQWIDLIEMKISFLTSIPGFLEDANLSDAYIEETFLAHELANAYTKSKSIMSEQ        | 118 |
| BAI86935.2 BEST195 | DQAGIADQWIDLIEMKISFLTSIPGFLEDANLSDAYIEESFLEHELANANSKSKSIMSEQ        | 120 |
|                    | *****                                                               |     |
|                    | <b>LGX</b>                                                          |     |
| AII36371.1 TO-A    | KKAMKDI LNDINDILPLDLFSTETFKNELSSAEKKRKEAIEKMDEVDQNLTSYGLSEAN        | 178 |
| YqcG NCIB3610      | KKAMKDI LNDINDILPLDLFSTETFKNELSSAEKKRKEAIEKMDEVDQNLTSYGLSEAN        | 178 |
| ADV93340.1 BSn5    | KKAMQDI LNDINDILPLDLFSTETFKNELSSAEKKRKEAIEKMDEVENLTSYGLSEAN         | 178 |
| AEP87466.1 TU-B-10 | KKAMQDI LNDINDILPLDLFSTETFKNELSSAEKKRKEAIEKMDEVENLTSYGLSEAN         | 138 |
| AEP91632.1 RO-NN-1 | KKAMKDI LNDINDILPLDLFSTETFKNELSSAEKKRKEAIEKMDEVENLTSYGLSEAN         | 178 |
| BAI86935.2 BEST195 | KKAIKDILNEIHDVLPDLVSTEDFKTELSSAEKKRKNVTEKISEVDEDLTSYALSEAN          | 180 |
|                    | ***:****:*.****:*** ** *****:*** *****:*****                        |     |
|                    | <b>LGX</b>                                                          |     |
| AII36371.1 TO-A    | EQMIQADYQALMNATAKGSASPIHYNKAYRDSEIHKMTEDVKKQSTDYISFKDQQAEO          | 238 |
| YqcG NCIB3610      | EQMIQADYQALMNATAKGSASPIHYNKAYRDSEIHKMTEDVKKQSTDYISFKDQQAEO          | 238 |
| ADV93340.1 BSn5    | EQMIQADYQALMNATAKGSASPIHYNAMAYRDSEIHKMTEDVKKQSTDYISFKDQQAEO         | 238 |
| AEP87466.1 TU-B-10 | EQMIQADYQALMNATAKGSSTSPIHYNKAYRDSEIHKMTEDVKKQSTDYISFKDQQTEQ         | 198 |
| AEP91632.1 RO-NN-1 | EQMIQADYQALMNATAKGSASPIHYNKAYRDSEIHKMTEDVKKQSTDYISFKDQQAEO          | 238 |
| BAI86935.2 BEST195 | EQMIQADYQALINATAKGSASPIHYNKAYRDSEIHKMTEDVKKQSTDYIAFKDQQAEO          | 240 |
|                    | *****:*****:*****:*****:*****:*****:*****:*****:*****:*             |     |
|                    | <b>LGX</b>                                                          |     |
| AII36371.1 TO-A    | RRIAKEQEELANRPWYEKSWDAVCNFTGEVSGYDYKRAADGVDVPTGEKLTAGORVAAG         | 298 |
| YqcG NCIB3610      | RRIAKEQEELANRPWYEKSWDAVCNFTGEVSGYDYKRAADGVDVPTGEKLTAGORVAAG         | 298 |
| ADV93340.1 BSn5    | RRIAKEQEELANRPWYEKSWDAVCNFTGEVSGYDYKRAADGVDVPTGEKLTAGORVAAG         | 298 |
| AEP87466.1 TU-B-10 | RRIAKEQEELANRPWYEKSWDAVCNFTGKVSQYDYKRAADGVDVPTGEKLTAGORVAAG         | 258 |
| AEP91632.1 RO-NN-1 | RRIAKEQEELANRPWYEKSWDAVCNFTGEVSGYDYKRAADGVDVPTGEKLTAGORVAAG         | 298 |
| BAI86935.2 BEST195 | RRLAKEQEELANRPWYEKSWDVVNCNFTGEVSGYDYKRAADGVDVPTGEKLTAGORVAAG        | 300 |
|                    | ** :*****:*****:*****:*****:*****:*****:*****:*****                 |     |
|                    | <b>LGX</b>                                                          |     |
| AII36371.1 TO-A    | AMAAAGYIPIVGWAGKLAGGKAVYSTSKALYRADKALDVYKTPKTFHALQNSKGLYGL          | 358 |
| YqcG NCIB3610      | AMAAAGYIPIVGWAGKLAGGKAVYSTSKALYRADKALDVYKTPKTFHALQNSKGLYGL          | 358 |
| ADV93340.1 BSn5    | AMAAAGYIPIVGWAGKLAGGKAVYSTSKALYRADKALDVYKTPKTFHALQNSKGLYGL          | 358 |
| AEP87466.1 TU-B-10 | AMAAAGYIPIVGWAGKLAGGKAVYSTSKALYKADKALDVYKTPKTFHALQNSKGLYGL          | 318 |
| AEP91632.1 RO-NN-1 | AMAAAGYIPIVGWAGKLAGGKAVYSTSKVLYRADKALDVYKTPKTFHALQNSKGLYGL          | 358 |
| BAI86935.2 BEST195 | AMAAAGYVPIVGWAGKLAGGKAVYSTSKALYTADKALDVYKTPQTFHALQNSKGLYGL          | 360 |
|                    | *****:*****:*****:*****:*****:*****:*****:*****:*****               |     |
|                    | <b>LGX</b>                                                          |     |
| AII36371.1 TO-A    | ASANGFSEAITGRDMFGNKVSKERQEQSLSGAMAMLVPPFGARGINKKLNAKSSSRVSEAS       | 418 |
| YqcG NCIB3610      | ASANGFSEAITGRDMFGNKVSKERQEQSLSGAMAMLVPPFGARGINKKLNAKSSSRVSEAS       | 418 |
| ADV93340.1 BSn5    | ASANGFSEAITGRDMFGNKVSKERQEQSLSGAMAMLVPPFGARGINKKLNAKSSSRVSEAS       | 418 |
| AEP87466.1 TU-B-10 | ASANGFSEAITGHDHMFNGKVSDEQRQNSINLALSAFVPPFVGHVSGKLNAKSKSTSGIAS       | 378 |
| AEP91632.1 RO-NN-1 | ASANGFSEAITGHDMLGNKVSDEQRQNSINLALSAFVPPFVGHVSGKLNAKSKSTSGIAS        | 418 |
| BAI86935.2 BEST195 | ASANGFSEAITGRDMFGNKISKEQOHNSINAAALAVFMPFGAKGFSGKTLKASSSTETV-        | 419 |
|                    | *****:***:***:***:***:***:***:***:***:***:***:***:***:***:***:***:* |     |
|                    | <b>toxin</b>                                                        |     |
| AII36371.1 TO-A    | TNTSKKPK-----VPKTYKRPTYFRKGVRDKVWENAKDSTGS-VKDPLTK-QVMKKD           | 468 |
| YqcG NCIB3610      | TNTSKKPK-----VPKTYKRPTYFRKGVRDKVWENAKDSTGS-VKDPLTK-QVMKKD           | 468 |
| ADV93340.1 BSn5    | TNTSKKPK-----VPKTYKRPTYFRKGVRDKVWENAKDSTGS-VKDPLTK-QVMKKD           | 468 |
| AEP87466.1 TU-B-10 | GANKNYHESRSASLREIKRQLNIPRTQQPA-SQKMV-PLTDSNGNRI LNEKKQ-PVMTRE       | 435 |
| AEP91632.1 RO-NN-1 | GSNKNYHESRSASLREIKRQLNIPRTQQPA-SQKMV-PLTDSNGNRI LNEKKQ-PVMTRE       | 475 |
| BAI86935.2 BEST195 | ---TQVTVSRKGAFKAKRAGIPRAQQPESINRVEMRTPAPHEGGRVIKDKNGKI IRTRE        | 476 |
|                    | : : : : : * : : : : * : : : : * : : : : * : : : : *                 |     |
|                    | <b>toxin</b>                                                        |     |
| AII36371.1 TO-A    | EPWD-MGH-----KPGYEFRKHQOSAMERNISRKQFLDEHNNPDHYQPELPSSNRSH           | 519 |
| YqcG NCIB3610      | EPWD-MGH-----KPGYEFRKHQOSAMERNISRKQFLDEHNNPDHYQPELPSSNRSH           | 519 |
| ADV93340.1 BSn5    | EPWD-MGH-----KPGYEFRKHQOSAMERNISRKQFLDEHNNPDHYQPELPSSNRSH           | 519 |
| AEP87466.1 TU-B-10 | LTYE-INGKKIVIQDHSHGDFEGE-----G-----IGNQPSHHNVRPENNTRNG              | 479 |
| AEP91632.1 RO-NN-1 | LTYE-INGKKIVIQDHSHGDFEGE-----G-----IGNQPSHHNVRPENNTRNG              | 519 |
| BAI86935.2 BEST195 | YTFNTNNKGEKIIIQDHSAGHEK-----GGQGFHNVRPIDNTRTG                       | 516 |
|                    | : : : : : * : : : : * : : : : * : : : : *                           |     |
|                    | <b>LGX</b>                                                          |     |
| AII36371.1 TO-A    | KGEDMTDDYFGD-----                                                   | 531 |
| YqcG NCIB3610      | KGEDMTDDYFGD-----                                                   | 531 |
| ADV93340.1 BSn5    | KGEDMTDDYFGD-----                                                   | 531 |
| AEP87466.1 TU-B-10 | KVDGMEDHYFDRNRK                                                     | 496 |
| AEP91632.1 RO-NN-1 | KVDGMEDHYFDRNRK                                                     | 536 |
| BAI86935.2 BEST195 | KVPGTKEHYPFNK----                                                   | 529 |
|                    | * . :.* :                                                           |     |

S4 Fig C

D

|                      | <b>LXG</b>                                                    |    |
|----------------------|---------------------------------------------------------------|----|
| YwqJ NCIB3610        | MSKVFESKSLIEEAKSRKKQYETLEEQLNLTLLKAFQGVADLGDNFKGKGADNIKDFQGGQ | 60 |
| AKD36832.1_HJ5       | MSKVFESKSLIEEAKSRKKQYETLEEQLNLTLLKAFQGVADLGDNFKGKGADNIKDFQGGQ | 60 |
| BAO93629.1_BEST195   | MSKVFESKSLIEEAKSRKKQYETLEEQLNLTLLKAFQGVADLGDNFKGKGADNIKDFQGGQ | 60 |
| AGE65222.1_XF-1      | MSKVFESKSLIEEAKSRKKQYETLEEQLNLTLLKAFQGVADLGDNFKGKGADNIKDFQGGQ | 60 |
| ADV94423.1_BSn5      | MSKVFESKSLIEEAKSRKKQYETLEEQLNLTLLKAFQGVADLGDNFKGKGADNIKDFQGGQ | 60 |
| AGA21789.1_BSP1      | MSKVFESKSLIEEAKSRKKQYETLEEQLNLTLLKAFQGVADLGDNFKGKGADNIKDFQGGQ | 60 |
| AII38166.1_TO-A      | MSKVFESKSLIEEAKSRKKQYETLEEQLNLTLLKAFQGVADLGDNFKGKGADNIKDFQGGQ | 60 |
| AEP92663.1_RO-NN-1   | MSKVFESKSLIEEAKSRKKQYETLEEQLNLTLLKAFQGVADLGDNFKGKGADNIKDFQGGQ | 60 |
| AIC99919.1_OH131.1   | MSKVFESKSLIEEAKSRKKQYETLEEQLNLTLLKAFQGVADLGDNFKGKGADNIKDFQGGQ | 60 |
| AEP88550.1_TU-B-10   | MSKVFESKSLIEEAKSRKKQYETLEEQLNLTLLKAFQEVADLGDNFKGKGADNIKDFQGGQ | 60 |
| ADM39597.1_W23       | MSKVFESKSLIEEAKSRKKQYETLEEQLNLTLLKAFQEVADLGDNFKGKGADNIKDFQGGQ | 60 |
| AMR61191.1_ATCC49760 | MSKVFESQSLIDEAEKRRKKQYETFEELNLTLLKAFQGVADLGDNFKGKGADNIKDFQGGQ | 60 |

|                      | <b>LXG</b>                                                |     |
|----------------------|-----------------------------------------------------------|-----|
| YwqJ NCIB3610        | AEIVDSWTLVSAQIAFLNGISGDIKQDELNSYVETSFLDHELPGDLKASEIVSAHKE | 120 |
| AKD36832.1_HJ5       | AEIVDSWTLVSAQIAFLNGISGDIKQDELNSYVETSFLDHELPGDLKASEIVSAHKE | 120 |
| BAO93629.1_BEST195   | AEIVDSWTLVSAQIAFLNGISGDIKQDELNSYVETSFLDHELPGDLKASEIVSAHKE | 120 |
| AGE65222.1_XF-1      | AEIVDSWTLVSAQIAFLNGISGDIKQDELNSYVETSFLDHELPGDLKASEIVSAHKE | 120 |
| ADV94423.1_BSn5      | AEIVDSWTLVSAQIAFLNGISGDIKQDELNSYVETSFLDHELPGDLKASEIVSAHKE | 120 |
| AGA21789.1_BSP1      | AEIVDSWTLVSAQIAFLNGISGDIKQDELNSYVETSFLDHELPGDLKASEIVSAHKE | 120 |
| AII38166.1_TO-A      | AEIVDSWTLVSAQIAFLNGISGDIKQDELNSYVETSFLDHELPGDLKASEIVSAHKE | 120 |
| AEP92663.1_RO-NN-1   | AEIVDSWTLVSAQIAFLNGISGDIKQDELNSYVETSFLDHELPGDLKASEIVSAHKE | 120 |
| AIC99919.1_OH131.1   | AEIVDSWTLVSAQIAFLNGISGDIKQDELNSYVETSFLDHELPGDLKASEIVSAHKE | 120 |
| AEP88550.1_TU-B-10   | AEIVESWTLVSAQIAFLNGISGDIKQDELNSYVETSFLDHELPGDLKASEIVSAHKE | 120 |
| ADM39597.1_W23       | AEIVESWTLVSAQIAFLNGISGDIKQDELNSYVETSFLDHELPGDLKASEIVSAHKE | 120 |
| AMR61191.1_ATCC49760 | AEIVDSWTLVSSQIAFLNGISGDIKQDELNSYVETSFLDHELPGDLKASEIVSAHKA | 120 |

|                      | <b>LXG</b>                                                      |     |
|----------------------|-----------------------------------------------------------------|-----|
| YwqJ NCIB3610        | EIDSILSGISDIIIDLDMYTLDDYADKMGDAQKIRRDITITAVDKLDESILTTEYQNLESLDN | 180 |
| AKD36832.1_HJ5       | EIDSILSGISDIIIDLDMYTLDDYADKMGDAQKIRRDITITAVDKLDESILTTEYQNLESLDN | 180 |
| BAO93629.1_BEST195   | EIDSILSGISDIIIDLDMYTLDDYADKMGDAQKIRRDITITAVDKLDESILTTEYQNLESLDN | 180 |
| AGE65222.1_XF-1      | EIDSILSGISDIIIDLDMYTLDDYADKMGDAQKIRRDITITAVDKLDESILTTEYQNLESLDN | 180 |
| ADV94423.1_BSn5      | EIDSILSGISDIIIDLDMYTLDDYADKMGDAQKIRRDITITAVDKLDESILTTEYQNLESLDN | 180 |
| AGA21789.1_BSP1      | EIDSILSGISDIIIDLDMYTLDDYADKMGDAQKIRRDITITAVDKLDESILTTEYQNLESLDN | 180 |
| AII38166.1_TO-A      | EIDSILSGISDIIIDLDMYTLDDYADKMGDAQKIRRDITITAVDKLDESILTTEYQNLESLDN | 180 |
| AEP92663.1_RO-NN-1   | EIDSILSGISDIIIDLDMYTLDDYADKMGDAQKIRRDITITAVDKLDESILTTEYQNLESLDN | 180 |
| AIC99919.1_OH131.1   | EIDSILSGISDIIIDLDMYTLDDYADKMGDAQKIRRDITITAVDKLDESILTTEYQNLESLDN | 180 |
| AEP88550.1_TU-B-10   | EIDSILSGISDIIIDLDMYTLDDYADKMGDAQKIRRDITITAVDKLDESILTTEYQNLESLDN | 180 |
| ADM39597.1_W23       | EIDSILSGISDIIIDLDMYTLDDYADKMGDAQKIRRDITITAVDKLDESILTTEYQNLESLDN | 180 |
| AMR61191.1_ATCC49760 | EIDSILSGISDIIIDLDMYSLDNYADKMDNAQKVRRDITITAVDQLDESILTTEYQNLESLDN | 180 |

|                      | <b>LXG</b>                                                    |     |
|----------------------|---------------------------------------------------------------|-----|
| YwqJ NCIB3610        | AVLTKYSVLMQATSNGKSASPMYYDKKAFHSNEVYKSVIEVENQGTYYIDAKTQQAEARR  | 240 |
| AKD36832.1_HJ5       | AVLTKYSVLMQATSNGKSASPMYYDKKAFHSNEVYKSVIEVENQGTYYIDAKTQQAEARR  | 240 |
| BAO93629.1_BEST195   | AVLTKYSVLMQATSNGKSASPMYYDKKAFHSNEVYKSVIEVENQGTYYIDAKTQQAEARR  | 240 |
| AGE65222.1_XF-1      | AVLTKYSVLMQATSNGKSASPMYYDKKAFHSNEVYKSVIEVENQGTYYIDAKTQQAEARR  | 240 |
| ADV94423.1_BSn5      | AVLTKYSVLMQATSNGKSASPMYYDKKAFHSNEVYKSVIEVENQGTYYIDAKTQQAEARR  | 240 |
| AGA21789.1_BSP1      | AVLTKYSVLMQATSNGKSASPMYYDKKAFHSNEVYKSVIEVENQGTYYIDAKAQQAEARR  | 240 |
| AII38166.1_TO-A      | AVLTKYSVLMQATSNGKSASPMYYDKKAFHSNEVYKSVIEVENQGTYYIDAKAQQAEARR  | 240 |
| AEP92663.1_RO-NN-1   | AVLTKYSVLMQATSNGKSASPMYYDKKAFHSNEVYKSVIEVENQGTYYIDAKTQQAEARR  | 240 |
| AIC99919.1_OH131.1   | AVLTKYSVLMQATSNGKSASPMYYDKKAFHSNEVYKSVIEVENQGTYYIDAKTQQAEARR  | 240 |
| AEP88550.1_TU-B-10   | AVLTKYSVLMQATSNGKSASPMYYDKKAFHSNEVYKSVIEVEKQGTYYIDAKAQQAEARR  | 240 |
| ADM39597.1_W23       | AVLTKYSVLMQATSNGKSASPMYYDKKAFHSNEVYKSVIEVEKQGTYYIDAKAQQAEARR  | 240 |
| AMR61191.1_ATCC49760 | AVLSKYSVLMQATSNGKSATPMYYDKKAFHSNEVYKSVIEVEKQGTYSYIEAKEQQAEARR | 240 |

|                      | <b>LXG</b>                                                  |     |
|----------------------|-------------------------------------------------------------|-----|
| YwqJ NCIB3610        | LQEKAEEEEANKPWYEKTWDGVCNFTGEVTTYDYKRATEGVDPVTGEKLSAERTVAGAM | 300 |
| AKD36832.1_HJ5       | LQEKAEEEEANKPWYEKTWDGVCNFTGEVTTYDYKRATEGVDPVTGEKLSAERTVAGAM | 300 |
| BAO93629.1_BEST195   | LQEKAEEEEANKPWYEKTWDGVCNFTGEVTTYDYKRATEGVDPVTGEKLSAERTVAGAM | 300 |
| AGE65222.1_XF-1      | LQEKAEEEEANKPWYEKTWDGVCNFTGEVTTYDYKRATEGVDPVTGEKLSAERTVAGAM | 300 |
| ADV94423.1_BSn5      | LQEKAEEEEANKPWYEKTWDGVCNFTGEVTTYDYKRATEGVDPVTGEKLSAERTVAGAM | 300 |
| AGA21789.1_BSP1      | LQEKAEEEEANKPWYEKTWDGVCNFTGEVTTYDYKRATEGIDPVTGEKLSAERTVAGAM | 300 |
| AII38166.1_TO-A      | LQEKAEEEEANKPWYEKTWDGVCNFTGEVTTYDYKRATEGIDPVTGEKLSAERTVAGAM | 300 |
| AEP92663.1_RO-NN-1   | LQEKAEEEEANKPWYEKTWDGVCNFTGEVTTYDYKRATEGVDPVTGEKLSAERTVAGAM | 300 |
| AIC99919.1_OH131.1   | LQEKAEEEEANKPWYEKTWDGVCNFTGEVTTYDYKRATEGVDPVTGEKLSAERTVAGAM | 300 |
| AEP88550.1_TU-B-10   | LQEKAEEEEANKPWYEKTWDGVCNFTGEVTTYDYKRATEGVDPVTGEKLSAERTVAGAM | 300 |
| ADM39597.1_W23       | LQEKAEEEEANKPWYEKTWDGVCNFTGEVTTYDYKRATEGVDPVTGEKLSAERTVAGAM | 300 |
| AMR61191.1_ATCC49760 | LQEKAEEEEANKPWYEKTWDGICTFTTEVSGYDYKRATEGVDPVTGEKLSAERTVAGAM | 300 |

D

|                      |                                                                |     |
|----------------------|----------------------------------------------------------------|-----|
| YwqJ NCIB3610        | AAAGFIPVVGWAGRAFKGGKAIYKTGKAAIAAEHALDAYKTGKSLDILKMTMTEMGAYGLVA | 360 |
| AKD36832.1_HJ5       | AAAGFIPVVGWAGRAFKGGKAIYKTGKAAIAAEHALDAYKTGKSLDILKMTMTEMGAYGLVA | 360 |
| BAO93629.1_BEST195   | AAAGFIPVVGWAGRAFKGGKAIYKTGKAAIAAEHALDAYKTGKSLDILKMTMTEMGAYGLVA | 360 |
| AGE65222.1_XF-1      | AAAGFIPVVGWAGRAFKGGKAIYKTGKAAIAAEHALDAYKTGKSLDILKMTMTEMGAYGLVA | 360 |
| ADV94423.1_BSn5      | AAAGFIPVVGWAGRAFKGGKAIYKTGKAAIAAEHALDAYKTGKSLDILKMTMTEMGAYGLVA | 360 |
| AGA21789.1_BSP1      | AAAGFIPVVGWAGRAFKGGKAIYKTGKAAIAAEHALDAYKTGKSLDILKMTMTEMGAYGLVA | 360 |
| AII38166.1_TO-A      | AAAGFIPVVGWAGRAFKGGKAIYKTGKAAIAAEHALDAYKTGKSLDILKMTMTEMGAYGLVA | 360 |
| AEP92663.1_RO-NN-1   | AAAGFIPVVGWAGRAFKGGKAIYKTGKAAIAAEHALDAYKTGKSLDILKMTMTEMGAYGLVA | 360 |
| AIC99919.1_OH131.1   | AAAGFIPVVGWAGRAFKGGKAIYKTGKAAIAAEHALDAYKTGKSLDILKMTMTEMGAYGLVA | 360 |
| AEP88550.1_TU-B-10   | AAAGFIPVVGWAGRAFKGGKAIYKTGKAAIAADHALDAYKTGKSLDILKMTMTEMGAYGLVA | 360 |
| ADM39597.1_W23       | AAAGFIPVVGWAGRAFKGGKAIYKTGKAAIAADHALDAYKTGKSLDILKMTMTEMGAYGLVA | 360 |
| AMR61191.1_ATCC49760 | AAAGFIPVVGWAGRAFKGGKAIYKTGKAAITAEHALDAYKTGKSLDILKMTMTEMGAYGLVA | 360 |

|                      |                                                                |     |
|----------------------|----------------------------------------------------------------|-----|
| YwqJ NCIB3610        | SNGFSEAVTGRDMFGNKVSEEKRRKQGALEAITIIGGAGL-AHYFDRLYQKNAPYVNVKSN  | 419 |
| AKD36832.1_HJ5       | SNGFSEAVTGRDMFGNKVSEEKRRKQGALEAALSLVGAGALAKSVNDNL-----SMGRNLDK | 416 |
| BAO93629.1_BEST195   | SNGFSEAVTGRDMFGNKVSEEKRRKQGALEAALSLVGAGALAKSVNDNL-----SMGRNLDK | 416 |
| AGE65222.1_XF-1      | SNGFSEAVTGRDMFGNKVSEEKRRKQGALEAVLSLVGAGALAKHIDKGI----PLATHSKV  | 416 |
| ADV94423.1_BSn5      | SNGFSEAVTGRDMFGNKVSEEKRRKQGALEAALSLVGAGALAKHIDKGI----PLATHSKV  | 416 |
| AGA21789.1_BSP1      | SNGFSEAVTGRDMFGNKVSEEKRRKQGALEAALSLVGAGALAKHIDKGI----PLATHSKV  | 416 |
| AII38166.1_TO-A      | SNGFSEAVTGRDMFGNKVSEEKRRKQGALEAALSLVGAGALAKHIDKGI----PLATHSKV  | 416 |
| AEP92663.1_RO-NN-1   | SNGFSEAVTGRDMFGNKVSEEKRRKQGALEAALSLVGAGALAKHIDKGI----PLATHSKV  | 416 |
| AIC99919.1_OH131.1   | SNGFSEAVTGRDMFGNKVSEEKRRKQGALEAALSLVGAGALAKHIDKGI----PLATHSKV  | 416 |
| AEP88550.1_TU-B-10   | SNGFSEAVTGRDMFGNKVSEEKRRKQGALEAALSLVGAGALAKHINKGI----PLATHSKV  | 416 |
| ADM39597.1_W23       | SNGFSEAVTGRDMFGNKVSEEKRRKQGALEAALSLVGAGALAKHINKGI----PLATHSKV  | 416 |
| AMR61191.1_ATCC49760 | SNGFSEAVTGRDMFGNKVSEEKRRKQGALEAALSLVGAGALAKHIDKGI----PLATHSKV  | 416 |

|                      |                                                               |     |
|----------------------|---------------------------------------------------------------|-----|
| YwqJ NCIB3610        | ESLISNIAKTTEEKQTRLQYLRNKH-----GVLKSKEDLH-----HRINLRAEVLNLSRIK | 470 |
| AKD36832.1_HJ5       | SY-----S---FSK-----IKQSGHINKEQIVTSTGHTFDLKPEKKQLYTKK-----VN   | 457 |
| BAO93629.1_BEST195   | SY-----S---FSK-----IKQSGHINKEQIVTSTGHTFDLKPEKKQLYTKK-----VN   | 457 |
| AGE65222.1_XF-1      | QT-----ANKTLEKVKQFKVPTNVRVYAERPVTDPDGFTFGIPTVVRVDVEKTA-----VK | 465 |
| ADV94423.1_BSn5      | QK-----ANKTLEKVKQFKVPTNVRVYAERPVTDPDGFTFGIPTVVRVDVEKTA-----VK | 465 |
| AGA21789.1_BSP1      | QK-----ANKTLEKVKQFKVPTNVRVYAERPVTDPDGFTFGIPTVVRVDVEKTA-----VK | 465 |
| AII38166.1_TO-A      | QK-----ANKTLEKVKQFKVPTNVRVYAERPVTDPDGFTFGIPTVVRVDVEKTA-----VK | 465 |
| AEP92663.1_RO-NN-1   | QK-----ANKTLEKVKQFKVPTNVRVYAERPVTDPDGFTFGIPTVVRVDVEKTA-----VK | 465 |
| AIC99919.1_OH131.1   | QK-----ANKTLEKVKQFKVPTNVRVYAERPVTDPDGFTFGIPTVVRVDVEKTA-----VK | 465 |
| AEP88550.1_TU-B-10   | QK-----ANKTLEKVKQFKVPTNVRVYAERPVTDPDGLTFGFPVTRVDVETKS-----VK  | 465 |
| ADM39597.1_W23       | QK-----ANKTLEKVKQFKVPTNVRVYAERPVTDPDGLTFGFPVTRVDVETKS-----VK  | 465 |
| AMR61191.1_ATCC49760 | QK-----ANTILEKAKQFKVPTNVRVYAERPVTNGFTFGFPVTRVDVGTKS-----VK    | 465 |

|                      |                                                             |     |
|----------------------|-------------------------------------------------------------|-----|
| YwqJ NCIB3610        | SSGLTKKQ--RGPAVA-----GVLDDKKTGNYYFGINNIDGKPPKVLHPLIHDRIV    | 518 |
| AKD36832.1_HJ5       | NDKLQSSKKAVDPVEQSVSYRQGGGAGNK-TSQYRIKVN-S-DGS---IAIPI-KNADL | 511 |
| BAO93629.1_BEST195   | NDKLQSSKKSVDPEQSVSYRQGGGAGNK-TSQYRIKVN-NGS---IVIPI-KNADL    | 511 |
| AGE65222.1_XF-1      | DLGI-----VKMVSDDGGRK-GSSHS-----P---NISEN-HDKVA              | 495 |
| ADV94423.1_BSn5      | DLGI-----VKMVSDDGGRK-GSSHS-----P---NISEN-HDKVA              | 495 |
| AGA21789.1_BSP1      | DLGI-----VKMVSDDGGRK-GSSHS-----P---NISEN-HDKVA              | 495 |
| AII38166.1_TO-A      | DLGI-----VKMVSDDGGRK-GSSHS-----P---NISEN-HDKVA              | 495 |
| AEP92663.1_RO-NN-1   | DLGI-----VKMVSDDGGRK-GSSHS-----P---NISEN-HDKVA              | 495 |
| AIC99919.1_OH131.1   | DLGI-----VKMVSDDGGRK-GSSHS-----P---NISEN-HDKVA              | 495 |
| AEP88550.1_TU-B-10   | DLGI-----VKMVSDDGGRK-GSSHS-----P---NISEN-HDKVA              | 495 |
| ADM39597.1_W23       | DLGI-----VKMVSDDGGRK-GSSHS-----P---NISEN-HDKVA              | 495 |
| AMR61191.1_ATCC49760 | DLGI-----VKMVSDDGGRK-GSSHS-----P---NISEN-HDKVA              | 495 |

|                      |                                                            |     |
|----------------------|------------------------------------------------------------|-----|
| YwqJ NCIB3610        | N--MPTELK-EGYIKTSAGSHAE-----VNALNEALLQRPDADLKDLMV-----     | 560 |
| AKD36832.1_HJ5       | NISAYNLEHAKYYRDVARPGGEIVDFKVPK---EVDDLKIE-----             | 549 |
| BAO93629.1_BEST195   | NISAYNLEHAKYYRDVARPGGEIVDFKVPK---EVDDLKIE-----             | 549 |
| AGE65222.1_XF-1      | H-----DGYYG---RKEFRMTLNNASFTPHGHKHVKAKTPPEEA               | 530 |
| ADV94423.1_BSn5      | H-----DGYYG---RKEFRMTLNNASFTPHGHKHVKAKTPPEEA               | 530 |
| AGA21789.1_BSP1      | H-----DGYYG---RKEFRMTLNNASFTPHGHKHVKAKTPPEEA               | 530 |
| AII38166.1_TO-A      | H-----DGYYG---RKEFRMTLNNASFTPHGHKHVKAKTPPEEA               | 530 |
| AEP92663.1_RO-NN-1   | K-----ERWEA---GNNFNKE--NRPRYPYNEVELEAKEAG-G                | 527 |
| AIC99919.1_OH131.1   | K-----ERWEA---GNNFNKE--NRPRYPYNEVELEAKEAG-G                | 527 |
| AEP88550.1_TU-B-10   | ID--PRLVVEMNFKGKPGTNAAGWERN-AKKFFNTLLKSNPEFWSAENTAKIK----- | 553 |
| ADM39597.1_W23       | ID--PRLVVEMNFKGKPGTNAAGWERN-AKKFFNTLLKSNPEFWSAENTAKIK----- | 553 |
| AMR61191.1_ATCC49760 | QK--PEDMTQNDYVAHNG-----NNYSKKKRTEEYNAIADR-----             | 518 |

D

|                      | toxin                                                    |     |
|----------------------|----------------------------------------------------------|-----|
| YwqJ NCIB3610        | --YVVSARK-----INKKMPE-----GV                             | 576 |
| AKD36832.1_HJ5       | ---TVIDQ--YGYTKNPRNQG--R-----TAPK---LVDPT-----TPGVSY     | 581 |
| BAO93629.1_BEST195   | ---TVIDQ--YGYTKNPRNQG--R-----TAPK---LVDPT-----TPGVSY     | 581 |
| AGE65222.1_XF-1      | KRFSMTGKKAQYLPDVNNKALEK-----KALLKGHIIDNGNNNYFYIDAGKTVGY  | 582 |
| ADV94423.1_BSn5      | KRFSMTGKKAQYLPDVNNKALEK-----EALLKGHIIDNGNNNYFYIDAGKTVGY  | 582 |
| AGA21789.1_BSP1      | KRFSMTGKKAQYLPDVNNKALEK-----EALLKGHIIDNGNNNYFYIDAGKTVGY  | 582 |
| AII38166.1_TO-A      | KRFSMTGKKAQYLPDVNNKALEK-----EALLKGHIIDNGNNNYFYIDAGKTVGY  | 582 |
| AEP92663.1_RO-NN-1   | KKYVV-----DSYSPNKE--IVSR-----KYTQLSDVQEKT---ALSYLNEITKKY | 568 |
| AIC99919.1_OH131.1   | KKYVV-----DSYSPNKE--IVSR-----KYTQLSDVQEKT---ALSYLNEITKKY | 568 |
| AEP88550.1_TU-B-10   | -----RGRVPVVEQFI-K-----HFP-----QYADYLKDPMRHH             | 582 |
| ADM39597.1_W23       | -----RGRVPVVEQFI-K-----HFP-----QYADYLKDPMRHH             | 582 |
| AMR61191.1_ATCC49760 | --EKIIGDNSNGYRLKEPTKWMENRGMVQIKERLKRKS-WTDNEGFNW-----QW  | 565 |
|                      | toxin                                                    |     |
| YwqJ NCIB3610        | PMPRCPHCEY----ITQNTNYIPEALKYGK-----                      | 602 |
| AKD36832.1_HJ5       | ELPAEPWIEWLEEYGHSAKKIE-----                              | 603 |
| BAO93629.1_BEST195   | ELPAEPWIEWLEEYGHSAKKIE-----                              | 603 |
| AGE65222.1_XF-1      | DLGT--PTSWIRAEF-SGGEYHGHPIAGSRLDKYL-----KQLGIDK-----     | 621 |
| ADV94423.1_BSn5      | DLGT--PTSWIRAEF-SGGEYHGHPIAGSRLDKYL-----KQLGIDK-----     | 621 |
| AGA21789.1_BSP1      | DLGT--PTSWIRAEF-SGGEYHGHPIAGSRLDKYL-----KQLGIDK-----     | 621 |
| AII38166.1_TO-A      | DLGT--PTSWIRAEF-SGGEYHGHPIAGSRLDKYL-----KQLGIDK-----     | 621 |
| AEP92663.1_RO-NN-1   | SSG-----SKI-SNGPFNPKALKGGRLKGELILEVPVQNKAIPOKILDEATKNRI- | 617 |
| AIC99919.1_OH131.1   | SSG-----SKI-SNGPFNPKALKGGRLKGELILEVPVQNKAIPOKILDEATKNRI- | 617 |
| AEP88550.1_TU-B-10   | HIGEGGQAAALPK-----SLHPGYGGIHNVE-----KEWGITGVDDQIANRLE    | 625 |
| ADM39597.1_W23       | HIGEGGQAAALPK-----SLHPGYGGIHNVE-----KEWGITGVDDQIANRLE    | 625 |
| AMR61191.1_ATCC49760 | DSQHGLLEKWNRRRTEHLGEFDPVTGKQ--TKK-----GEPSSRRWDG-----    | 605 |
|                      |                                                          |     |
| YwqJ NCIB3610        | -----                                                    | 602 |
| AKD36832.1_HJ5       | -----                                                    | 603 |
| BAO93629.1_BEST195   | -----                                                    | 603 |
| AGE65222.1_XF-1      | -----                                                    | 621 |
| ADV94423.1_BSn5      | -----                                                    | 621 |
| AGA21789.1_BSP1      | -----                                                    | 621 |
| AII38166.1_TO-A      | -----                                                    | 621 |
| AEP92663.1_RO-NN-1   | IIRDINGKVYN                                              | 628 |
| AIC99919.1_OH131.1   | IIRDINGKVYN                                              | 628 |
| AEP88550.1_TU-B-10   | TFRKESGR---                                              | 633 |
| ADM39597.1_W23       | TFRKESGR---                                              | 633 |
| AMR61191.1_ATCC49760 | -----                                                    | 605 |



|            |          | LXG                                |     |
|------------|----------|------------------------------------|-----|
| AID00230.1 | OH131.1  | MKTLDVHALHEGIOHTIEKLDKQKQOLEKLEKSV | 60  |
| AI138200.1 | TO-A     | MKTLDVHALHEGIOHTIEKLDKQKQOLEKLEKSV | 60  |
| Yxid       | NCIB3610 | MKTLDVHALHEGIOHTIEKLDKQKQOLEKLEKSV | 60  |
| ADM39953.1 | W23      | MKTLDVHALHEGIOHTIEKLDKQKQOLEKLEKSV | 60  |
| BAI87628.2 | BEST195  | MKTLDVHALHEGIOHTIEKLDKQKQOLEKLEKSV | 60  |
| AEP88894.1 | TU-B-10  | MKTLDVHALHEGIOHTIEKLDKQKQOLEKLEKSV | 60  |
| AEP92997.1 | RO-NN-1  | MKTLDVHALHEGIOHTIEKLDKQKQOLEKLEKSV | 60  |
| AGE65543.1 | XF-1     | MKTLDVHALHEGIOHTIEKLDKQKQOLEKLEKSV | 60  |
| AGI31091.1 | BAB-1    | MKTLDVHALHEGIOHTIEKLDKQKQOLEKLEKSV | 60  |
| AKD37149.1 | HJ5      | MKTLDVHALHEGIOHTIEKLDKQKQOLEKLEKSV | 60  |
|            |          | LXG                                |     |
| AID00230.1 | OH131.1  | KPFLFFGGMFIDEYKVKLQQTQHAISVSDSHG   | 120 |
| AI138200.1 | TO-A     | KPFLFFGGMFIDEYKVKLQQTQHAISVSDSHG   | 120 |
| Yxid       | NCIB3610 | KPFLFFGGMFIDEYKVKLQQTQHAISVSDSHG   | 120 |
| ADM39953.1 | W23      | KPFLFFGGMFIDEYKVKLQQTQHAISVSDSHG   | 120 |
| BAI87628.2 | BEST195  | KPFLFFGGMFIDEYKVKLQQTQHAISVSDSHG   | 120 |
| AEP88894.1 | TU-B-10  | KPFLFFGGMFIDEYKVKLQQTQHAISVSDSHG   | 120 |
| AEP92997.1 | RO-NN-1  | KPFLFFGGMFIDEYKVKLQQTQHAISVSDSHG   | 120 |
| AGE65543.1 | XF-1     | KPFLFFGGMFIDEYKVKLQQTQHAISVSDSHG   | 120 |
| AGI31091.1 | BAB-1    | KPFLFFGGMFIDEYKVKLQQTQHAISVSDSHG   | 120 |
| AKD37149.1 | HJ5      | KPFLFFGGMFIDEYKVKLQQTQHAISVSDSHG   | 120 |
|            |          | LXG                                |     |
| AID00230.1 | OH131.1  | DAVNRQTSADHIVSLPTVNDVDFRME         | 180 |
| AI138200.1 | TO-A     | DAVNRQTSADHIVSLPTVNDVDFRME         | 180 |
| Yxid       | NCIB3610 | DAVNRQTSADHIVSLPTVNDVDFRME         | 180 |
| ADM39953.1 | W23      | DAVNRQTSADHIVSLPTVNDVDFRME         | 180 |
| BAI87628.2 | BEST195  | DAVNRQTSADHIVSLPTVNDVDFRME         | 180 |
| AEP88894.1 | TU-B-10  | DAVNRQTSADHIVSLPTVNDVDFRME         | 180 |
| AEP92997.1 | RO-NN-1  | DAVNRQTSADHIVSLPTVNDVDFRME         | 180 |
| AGE65543.1 | XF-1     | DAVNRQTSADHIVSLPTVNDVDFRME         | 180 |
| AGI31091.1 | BAB-1    | DAVNRQTSADHIVSLPTVNDVDFRME         | 180 |
| AKD37149.1 | HJ5      | DAVNRQTSADHIVSLPTVNDVDFRME         | 180 |
|            |          | LXG                                |     |
| AID00230.1 | OH131.1  | QTMKKYIDQLETMYTGPKEITGYKSGSILKSQ   | 240 |
| AI138200.1 | TO-A     | QTMKKYIDQLETMYTGPKEITGYKSGSILKSQ   | 240 |
| Yxid       | NCIB3610 | QTMKKYIDQLETMYTGPKEITGYKSGSILKSQ   | 240 |
| ADM39953.1 | W23      | QTMKKYIDQLETMYTGPKEITGYKSGSILKSQ   | 240 |
| BAI87628.2 | BEST195  | QTMKKYIDQLETMYTGPKEITGYKSGSILKSQ   | 240 |
| AEP88894.1 | TU-B-10  | QTMKKYIDQLETMYTGPKEITGYKSGSILKSQ   | 240 |
| AEP92997.1 | RO-NN-1  | QTMKKYIDQLETMYTGPKEITGYKSGSILKSQ   | 240 |
| AGE65543.1 | XF-1     | QTMKKYIDQLETMYTGPKEITGYKSGSILKSQ   | 240 |
| AGI31091.1 | BAB-1    | QTMKKYIDQLETMYTGPKEITGYKSGSILKSQ   | 240 |
| AKD37149.1 | HJ5      | QTMKKYIDQLETMYTGPKEITGYKSGSILKSQ   | 240 |
|            |          | LXG                                |     |
| AID00230.1 | OH131.1  | LKKLAENEKSKVDSVVKTGDSKKVSKN        | 276 |
| AI138200.1 | TO-A     | LKKLAENEKSKVDSVVKTGDSKKVSKN        | 276 |
| Yxid       | NCIB3610 | LKKLAENEKSKVDSVVKTGDSKKVSKN        | 276 |
| ADM39953.1 | W23      | LKKLAENEKSKVDSVVKTGDSKKVSKN        | 276 |
| BAI87628.2 | BEST195  | LKKLEKHKQSNVDIVMKGDKQKQIEREIHADDS  | 300 |
| AEP88894.1 | TU-B-10  | LKKLEKHKQSNVDIVMKGDKQKQIEREIHADDS  | 300 |
| AEP92997.1 | RO-NN-1  | LKKLEKHKQSNVDSVMMDDKQKQIEREIHADDS  | 300 |
| AGE65543.1 | XF-1     | LKKLEKHKQSNVDSVMMDDKQKQIEREIHADDS  | 300 |
| AGI31091.1 | BAB-1    | LKKLEKHKQSNVDSVMMDDKQKQIEREIHADDS  | 300 |
| AKD37149.1 | HJ5      | LKKLEKHKQSNVDSVMMDDKQKQIEREIHADDS  | 300 |
|            |          | LXG                                |     |
| AID00230.1 | OH131.1  | NTSEHREHIKTDIFS---NAEVKQVYNDTLYNV  | 324 |
| AI138200.1 | TO-A     | NTSEHREHIKTDIFS---NAEVKQVYNDTLYNV  | 324 |
| Yxid       | NCIB3610 | NTSEHREHIKTDIFS---NAEVKQVYNDTLYNV  | 324 |
| ADM39953.1 | W23      | NTSEHREHIKTDIFS---NAEVKQVYNDTLYNV  | 324 |
| BAI87628.2 | BEST195  | NNKRLKKIDTIEVIDELTRNTASIDYVGGKYYV  | 360 |
| AEP88894.1 | TU-B-10  | NNKRLKKIDTIEVIDELTRNTASIDYVGGKYYV  | 360 |
| AEP92997.1 | RO-NN-1  | NNKRLKKIDTIEVIDELTRNTASIDYVGGKYYV  | 360 |
| AGE65543.1 | XF-1     | NNKRLKKIDTIEVIDELTRNTASIDYVGGKYYV  | 360 |
| AGI31091.1 | BAB-1    | NNKRLKKIDTIEVIDELTRNTASIDYVGGKYYV  | 360 |
| AKD37149.1 | HJ5      | NNKRLKKIDTIEVIDELTRNTASIDYVGGKYYV  | 360 |
|            |          | LXG                                |     |
| AID00230.1 | OH131.1  | KVDENGYVKILETAVELTGVYDLFKAATGRDPV  | 384 |
| AI138200.1 | TO-A     | KVDENGYVKILETAVELTGVYDLFKAATGRDPV  | 384 |
| Yxid       | NCIB3610 | KVDENGYVKILETAVELTGVYDLFKAATGRDPV  | 384 |
| ADM39953.1 | W23      | KVDENGYVKILETAVELTGVYDLFKAATGRDPV  | 384 |
| BAI87628.2 | BEST195  | K---VGGAKSLDSFLA-GTQYEFIEWVSPQAVK  | 412 |
| AEP88894.1 | TU-B-10  | K---VGGAKSLDSFLA-GTQYEFIEWVSPQAVK  | 412 |
| AEP92997.1 | RO-NN-1  | K---VGGAKSLDSFLA-GTQYEFIEWVSPQAVK  | 412 |
| AGE65543.1 | XF-1     | K---VGGAKSLDSFLA-GTQYEFIEWVSPQAVK  | 412 |
| AGI31091.1 | BAB-1    | K---VGGAKSLDSFLA-GTQYEFIEWVSPQAVK  | 412 |
| AKD37149.1 | HJ5      | K---VGGAKSLDSFLA-GTQYEFIEWVSPQAVK  | 412 |

E

|                    |                                                              |              |     |
|--------------------|--------------------------------------------------------------|--------------|-----|
|                    |                                                              | <b>toxin</b> |     |
| AID00230.1 OH131.1 | KLIDINKLINDGKKAKKASEVKNVAKDKGKIANDVSGSANKINSDLIKKYARDIEQRTGR |              | 444 |
| AI138200.1 TO-A    | KLIDINKLINNGKKAKKASEVKNVAKDKGKIANDVSGSANKINSDLIKKYARDIEQRTGR |              | 444 |
| YxiD NCIB3610      | KLIDINKLINNGKKAKKASEVKNVAKDKGKIANDVSGSANKINSDLIKKYARDIEQRTGR |              | 444 |
| ADM39953.1 W23     | KLIDINKLINDGKKAKKASEVKNVAKDTGNGVPSYGKKS-----LPKGPYREVHGFVPVK |              | 438 |
| BAI87628.2 BEST195 | IKGDVKKKPSKGS-----VNS-----KWWHPGYVDNLSSSQTVIGIKNSPKGLSTLGS   |              | 460 |
| AEP88894.1 TU-B-10 | IKGDVKKKTPKGS-----VNS-----KWWHPGYVDNLSSSQTVIGIKNSPKGLSTLGS   |              | 460 |
| AEP92997.1 RO-NN-1 | IKGEVNVKASKGT-----SEI-----GWNMSKGGGQIN-----GRKYSQHALERMAP    |              | 454 |
| AGE65543.1 XF-1    | SKGEVNVKASKGA-----SEG-----KMLV-----SSKTVISSDMEAKILEGQ-R      |              | 451 |
| AGI31091.1 BAB-1   | SKGEVNVKASKGA-----SEG-----KMLV-----SSKTVISSDMEAKILEGQ-R      |              | 451 |
| AKD37149.1 HJ5     | SKGEVNVKASKGA-----SEG-----KMLV-----SSKTVISSDMEAKILEGQ-R      |              | 451 |
|                    | .:.* .*                                                      |              |     |
|                    | <b>toxin</b>                                                 |              |     |
| AID00230.1 OH131.1 | ELPKNQIDKLKEA-----LRNK--EYK--KMSPIETAKHR---TKFD---K---VK     |              | 482 |
| AI138200.1 TO-A    | ELPKNQIDKLKEA-----LRNK--EYK--KMSPIETAKHR---TKFD---K---VK     |              | 482 |
| YxiD NCIB3610      | ELPKNQIDKLKEA-----LRNK--EYK--KMSPIETAKHR---TKFD---K---VK     |              | 482 |
| ADM39953.1 W23     | VKPGAQEKHIP-----NTP--NYK--QE--IANGKNK---SIFY-----GDNKTA      |              | 474 |
| BAI87628.2 BEST195 | STRQNALDAGKGVWQGAEKMYDKAGNFL-----GYKSVDKMRAFRLQYKPKERKMW     |              | 511 |
| AEP88894.1 TU-B-10 | STRQNALDAGKGVWGEAEMKMYDKAGNFL-----GYKSVDKMRAFRLQYKPKERKMW    |              | 511 |
| AEP92997.1 RO-NN-1 | DIPEV-----KAT-----L-----TNR--AIKKAELGYKPKQTRKF               |              | 483 |
| AGE65543.1 XF-1    | KVPKNILIGGHSS-----SINNANDNFAVEVLSTNADGTKSMFTKQFVDGNIISKIKKS  |              | 505 |
| AGI31091.1 BAB-1   | KVPKNILIGGHSS-----SINNANDNFAVEVLSTNADGTKSMFTKQFVDGNIISKIKKS  |              | 505 |
| AKD37149.1 HJ5     | KVPKNILIGGHSS-----SINNANDNFAVEVLSTNADGTKSMFTKQFVDGNIISKIKKS  |              | 505 |
|                    | <b>toxin</b>                                                 |              |     |
| AID00230.1 OH131.1 | NKVIKEWEENTGQKWPVYKENVVSEKTGKIIRKKGDKYDAHHIIENTFGGEHEWNNMHPA |              | 542 |
| AI138200.1 TO-A    | NKVIKEWEENTGQKWPVYKENVVSEKTGKIIRKKGDKYDAHHIIENTFGGEHEWNNMHPA |              | 542 |
| YxiD NCIB3610      | NKVIKEWEENTGQKWPVYKENVVSEKTGKIIRKKGDKYDAHHIIENTFGGEHEWNNMHPA |              | 542 |
| ADM39953.1 W23     | QELLDKYAG-----KGDFLKNGRERVDGKPIG-----KYDRNTG                 |              | 510 |
| BAI87628.2 BEST195 | RANFT-----ENEI-----TVVGSKT-----EL                            |              | 529 |
| AEP88894.1 TU-B-10 | RANFT-----ENEI-----TVVGSKT-----EL                            |              | 529 |
| AEP92997.1 RO-NN-1 | SDFIKKYVDPNRNISPSVIEDAI-----M-NTKKIPGNRS-----GTF--VHET       |              | 523 |
| AGE65543.1 XF-1    | TLFPESWN-----DDQI-----L-KSIIIEVGNTPPISTRLRDRSTWH-RASK        |              | 545 |
| AGI31091.1 BAB-1   | TLFPESWN-----DDQI-----L-KSIIIEVGNTPPISTRLRDRSTWH-RASK        |              | 545 |
| AKD37149.1 HJ5     | TLFPESWN-----DDQI-----L-KSIIIEVGNTPPISTRLRDRSTWH-RASK        |              | 545 |
|                    | <b>toxin</b>                                                 |              |     |
| AID00230.1 OH131.1 | KFPNEHQAGIHGTGSPANELFKGGKKK-----                             | 569          |     |
| AI138200.1 TO-A    | KFPNEHQAGIHGTGSPANELFKGGKKK-----                             | 569          |     |
| YxiD NCIB3610      | KFPNEHQAGIHGTGSPANELFKGGKKK-----                             | 569          |     |
| ADM39953.1 W23     | EYVETT-KGLIHYGKDGAHIVPSRP-----                               | 534          |     |
| BAI87628.2 BEST195 | RN---VHVDILD-----                                            | 538          |     |
| AEP88894.1 TU-B-10 | RN---VHVDILD-----                                            | 538          |     |
| AEP92997.1 RO-NN-1 | QD---VKVIINEAGDVIT-VIPK-----                                 | 542          |     |
| AGE65543.1 XF-1    | NG---VEIDVIKNGDEVTSGYPTGKVNAPRPSGF                           | 576          |     |
| AGI31091.1 BAB-1   | NG---VEIDVIKNGDEVTSGYPTGKVNAPRPSGF                           | 576          |     |
| AKD37149.1 HJ5     | NG---VEIDVIKNGDEVTSGYPTGKVNAPRPSGF                           | 576          |     |

S4 Fig E
