# Supplementary material for: Diverse LXG toxin and antitoxin systems specifically mediate intraspecies competition in Bacillus subtilis biofilms
Source: PubMed Central journal article supplement (PMC8321402; doi:10.1371/journal.pgen.1009682), 2021-07-19
Supplement: pgen.1009682.s005.pdf [file pgen.1009682.s005.pdf]

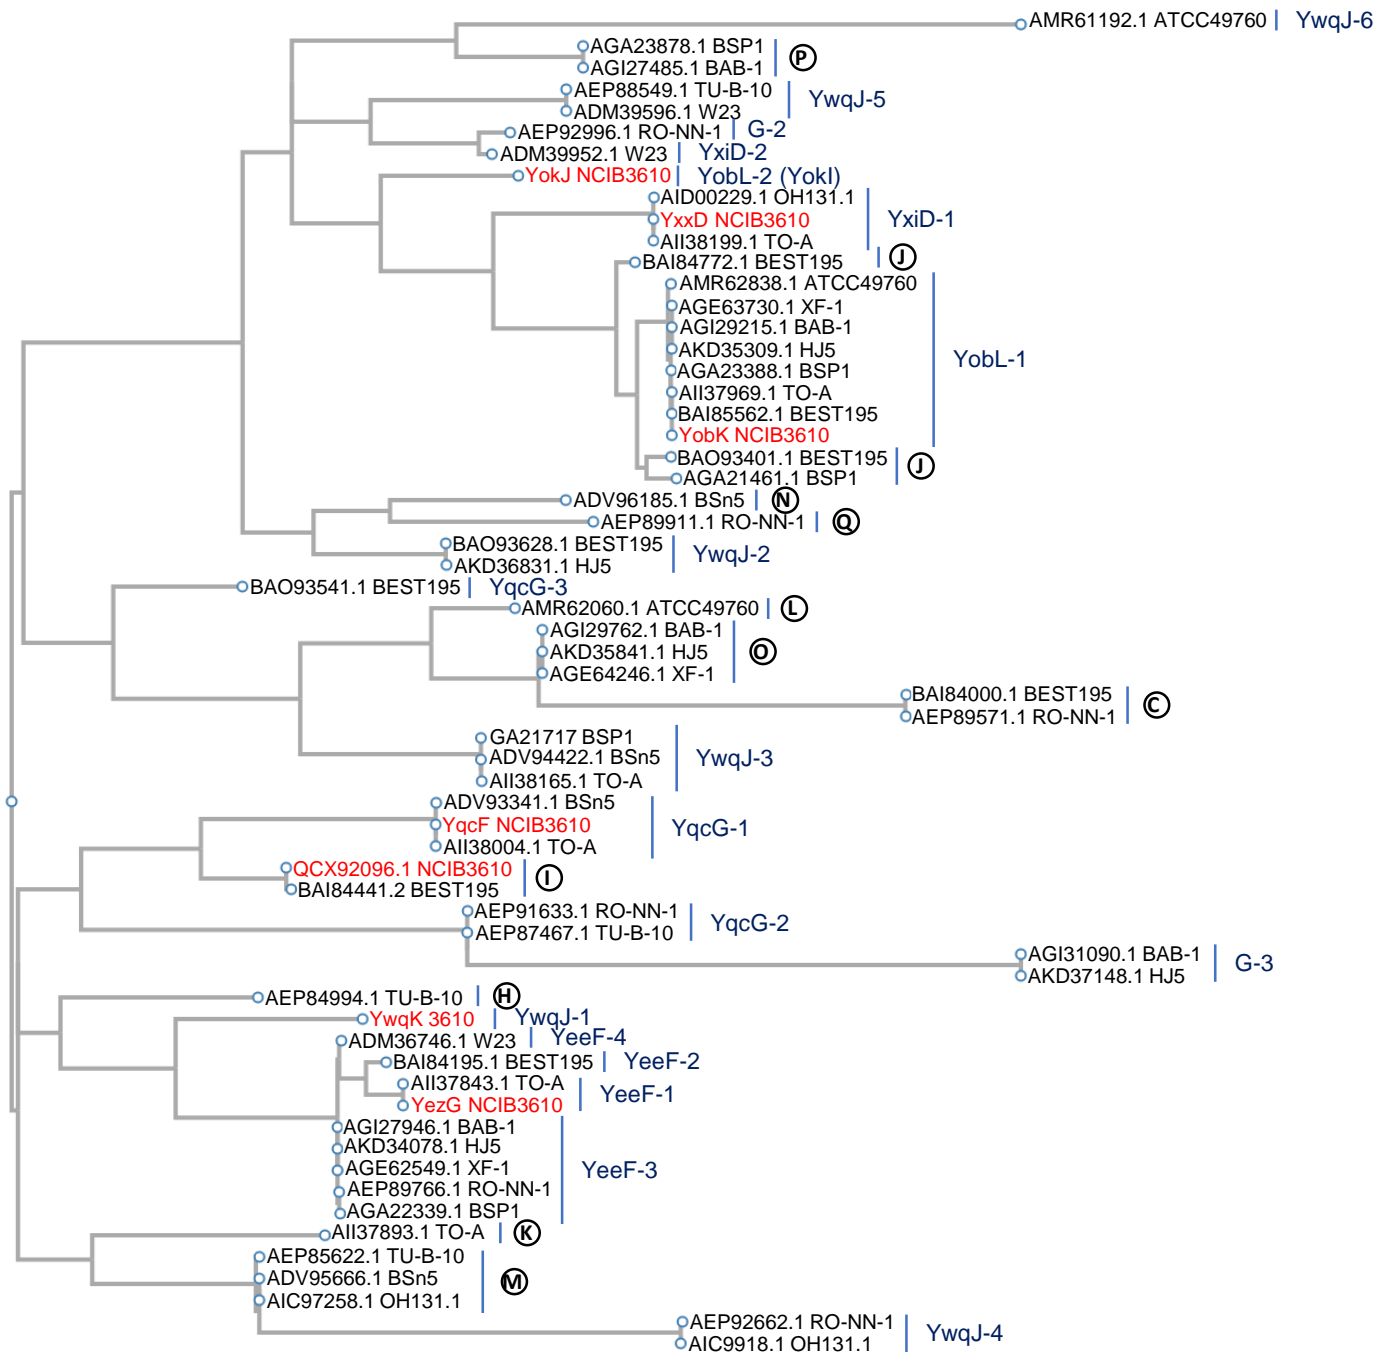

— 0.5
